# Supplementary material for: Nonreciprocal complementation of KNOX gene function in land plants
Source: PubMed Central journal article supplement (PMC5637896; doi:10.1111/nph.14318), 2016-11-25
Supplement: NPH-216-591-s004.pdf [file NPH-216-591-s004.pdf]

**Supporting Information Notes S2** Verified *M. polymorpha*, *S. pratensis* and *A. agrestis* KNOX plus *S. kraussiana* BELL sequences. Coding sequences are shown in bold typeface; 3'UTR sequences where known are shown in blue and homeodomain sequences in red; start/stop codons where known are underlined; sequences confirmed by PCR and sequencing are highlighted in yellow.

### *M. polymorpha* KNOX

>AXG93\_606s1230|MpKNOX1 cDNA

GTACGATGAATTAATAATTCCACTTTTTCTGGACTGTAGCAGTGGTCAGCATTTCAGGCGCT  
CGTCCTGGTTGCGAAACTTCAGTATTGCATCTCGTTATAGAATCGAGAGTCCGGGATTG  
GAATTGAAACCTACGCATTTGTACGGTTTCCTGGAAAATGCTAGGCAGCAGTTCCTTC  
**TTTGACTTCAATTTTGATCAGGAAGTTGCCAACCTACATCTCTCCGACTATTGTCAAAC**  
**TGAACCACAAACGCCACTGATAAACACACATACCACGCTATTACACAAGGAAGTAG**  
**TCCTAACTATCAGAGTCAGGTCTCCGTTGATCTTCAAACGGAATCATTGAGCTCTCT**  
**CCTCGAGGTCTCTCCACGATGACTATATCAGAAGACACGGGTTCAGAATACCACGCA**  
**GCCACTACAGAGCCTTTTCTCTACCTGTCAGACTTGGAGACACCACTTCAGAACACAG**  
**CTGATGGTAAACAGGATGTGACCCTCTCGGTTAACCTCACGGCATCTGATACGACAG**  
**TTCGTGCCGAAATTCAGGAAAGTGGAGAAAACCACCATGTAATTCTGGTCATTCTTT**  
**GTTGGACTCAATCTCTTACAATTCTTCGAGAGAAGCTGAAAACGATATAGAGTTTTGG**  
**CTACGTGCATATACAGCTCCAAGCAAAAATCTGCCTTTCGGCTGTGGGGAACCTAAG**  
**AAAACATACCACAAAATAGCAGACGGTAATTGCAACGTAGTCGATCAGAAGCCATGG**  
**GGCCCGCAACTGCTGCAATCATCTGAAGCTCCAAATCACGTCCTATCTCTCGAGACA**  
**AGAAAAGATGGAAATTCGAGTCAAGTAATTCTGGAAGGCCAATCTAACCTTGTGGAA**  
**GTGCAAACTGCGACTCGACGCTCGCCACGTTCACTTGAAGCTCTAAAAGATCTTGGG**  
**ATTTTTATGTTTGGAGAACTGAAGAGCCATGTCCCACCGTTGCAGAGGGTAAACTCA**  
**ACATTGAAAATACAGATACACTTTGGCAGCCTCAGTCTGAACCACACGATGACACTCT**  
**CTTTGGAGAATTGTTTAACTTCGACGATCGCGCAGAGGATGAAGATCACCGTCAATAC**  
**GTTTTGGGATCCATGTTGGAGGAGCTCGAGAAGTTCGTTGACAAATCCGATAATGAAC**  
**TTTGTAGAAGTTCTGAGACAACAAATGAATTAGACCTTCAGTGTCTCATCGTGCATCA**  
**TCCTGACCTCCCTAAGATAATTGTGGCAAGCCTTGCCTGCTATAAGATAAGGGCTGAT**  
**GAAGAGGAGAAAAAGCAGCTGGACGAGGTGGCCAACCTTATCTCTTTCCAAGCTCCCA**  
**GCACAAGACCAGCTTTTGGGGCGTGGATACTCCAGCAAGGGTAAAGACCCACGTCTC**  
**GACTTATGCTTGGATAAGTATCTGAAAGCCCTCGATGAGTTGGAGAAACACATTTCGA**  
**AGCTGGTCACGTCAGCCGACACTCACTGTGTTTCAAGATGAAACAGAACATTCTTATA**  
**GTGTCCAGAACTTGGTGTATGTTTCAAAGCAGAGCGAAAGTGATTCGGTCAGTGGTGG**  
**GCAAAGTGAGCTTTTCACTGAAGAAATGGAGAAGATAATTCAAGACCATGAAAAAGC**  
**AAAAGACAGGCCCCAGCGATCTGCCCTCCCCATGTTGACAGATCAAGAATGGAGAG**  
**GAGCAATCTTAGCTGCATATAATCCAAGTCTTCTCAGGACCTTGAAAACGAGGCATCT**  
**GAAAGAAGGCCGAGAAACCTGAAGCTGCCCGATCCGGCTCGACGTATTTTGCTCAA**  
**TTGGTGGACCGAACATCAGGGGAAGCCTTACCCGTCGGAGGAGAAACAAATTCTGGC**  
**CAAGTGCTCGGGCCTTGAGATTGATCAGATCAATAACTGGTTCATCAATCAGAGGAA**  
**AAGACACTGCTGCTCTGCGTTCTCTGAAAATCACAAGAACCATGCGGCCGACTGTTA**  
**CAAGATGAATGGCCCAAGACGAT**GATCTCCAGCCCCTTTTCGTTTCGCAGCTAGATTGA  
CATGCCTTCAGGAGAATCTATGATGTCGGACTCGATGACTCAAATCACATTTCTGCCAT  
GGACGTTTCTCAGAAGACGAGATTTGGAAGCTGTGAGCTGTACGTTGTGAGAACCAAAT  
GGAATCTTAACCATGATGTCATATAGAAGTCCAATAACTTTGAGGCCAGGTAGCTCATT  
TGAGTTTGTCTGCCAGATACATCCTGCAGATATTATGTCCCTTAGACTACGATTCTGAA  
A

>AXG93\_3769s1000|MpKNOX2\_cDNA\_long\_version

ATGGATGTGTCTGTGCACAGCGAAATGAGGAGAAGTAGCGGATCTCAATCGCTGAATC  
TGTGGCCACCCTCACTGTCAGAAGGTTGTGATCGAGACATCGAGGTCGTGTCGTCTCT  
GCGCCCATGTTTCGACAGTAACGCAGACGCCAAGCCGTACCATATCGAGGGAGATCAC  
GATCCGCTGCTGGAATCTCAGCCGCGCAATGAAGTCGAGGTAGAACGGTATTCGGGCG  
AGGAAGATCACAATCCGCTGCTGGATTTTCATCAGCGGAACCACGAGATTGGGAGTCT  
CCTGCTCCATGAGTGCAGAGAGCAACAGACCCGAGGAGCATGGGAGTCCGATGCTGCT  
CTGTGCGGAGGGGAGTGAGGTCCAACATTTCTCAGGGATTTGAAGAAATGCAAATC  
GACGACAAGGAAGAGGAGCGGGAGCAGACTAGGTTACAGCATAACGCAGCTCGATGGA  
GATGGTGATCTGAGAGAAGTGTGAGTCCGCATGATTTTCGAGGGGACGGCGAGCCGG  
ATGCAGCTGGAGACCTTCCACCAGCCTTCTATGGTAGTGGGGATGGATCCCACGGAG  
AGGAGGCCCTTCAGCTTGTGTATTATGAGAATGGACACGAGTCTCAGAGTGTGATGGAA  
TATGCTCACCTGCAGGAGCAAGAATTGGCATTGCACCAATATGCCATCGCGAACCAAG  
GTCGAGCTAATCATTCTACGTGCGAGATTGAGAATGAAGATGACACACTACATGAACAT  
CTTCCAGAACACTGGACTGGATCTAGTTTGCAGTCTGAGTGGCTGAGACGAAGGGAG  
CAGAGTACGGTTCTGAAAATGGGATGTTGTTTAAATCACCTGCATGATCAACAGATGGCA  
CTGCAGCAATATGCCATCCAGAATCCAAACGATGTGATTCTTCAGACTCGTGAGGATGA  
GAATGAAGGTCACAGATTACATGGAAGTATCCGCGAACACTTTACTGGATCGAGAATGC  
ATTCAGAATTCAATGTGCCGGCGGAGAGGAAAGGAAATTTTCAGTGAGCGTCAGGGACT  
TTCCACTCAGGTGATGCAAATTGATGATCAAAGGGAATCAGATCTCACTGGCGGGGATA  
CCCAAGGCCTGCAGGATATGGGAGGATGGATGGATACGAAGGCCTATCCCTGTGATGA  
GCAGTACCATGTAAGCATAGGAACAGGTTTCGTGGGAGATGTGCATGGCCAGGCTGAG  
ACTAGCTCTCTTTCAGCGATCGAACGAGAGGTTTCTTTTTCTGCACAATTGGCGGAAGA  
TGTGTGCATGAGCTCAGAAGAGGCACAGGCACATCAAGGAGTTTGGAAAGTCTCTTCCTC  
CCAGATTTAATCAATTCGGTTCTTGGATGCCAGAGAGGGGAATCTCCAGACAATTTACT  
ACAGCACACAGTCAAATGCCTCATCCTACACTGGTGGATCGTCTCCAGTAACAGGGCT  
TGTGACACCAAGATCAATTGCAAGTCCCACAAGGATTCCGCAAATGGACGTCAATCAAG  
CTTCTCACAACCTGATAATGGGATCTACAATGGCGTCTCAATGGATGGGTGTTTCTTCT  
ATACTCCTAACGACTTTGACTATGGGGTGTCTCAGATGAAGCTTACCCAGTCTTCAATC  
GAACATGCGGAATGTGGAATGAGTACTCTAAGGAGCCCTTCAGAACTTCCAGTCAAGTGT  
AAATTCAGCTGTAGATTTTCAGCAACCAATCTCAAAGTACCCAGATGCCAATTGACTTGAA  
AGCAATGCAAACATTTTGCAGCAGGCAACAGATTTCGAAGATTTTGTACCCATACAGGAAG  
GTGCGAAGGTGGGTAATATGTATCTACCATCATTTTCAATCACCAGCCATAGTTCCTCATC  
TGAATGTCCAGTCAACCGTCAATTGCAGAGTTAGCTCCAGTACCTTTTACCCATGCTCAC  
TACTATCTTCTGCACCCATGAATGATGTGCCTCGGTATTTCAACTTAGAACATCCAAAC  
CAATTCAGGACATAGGTCAGCTTGCAGATAACCATTCCTTGCAGGATTCGAATTCTGT  
TCCAACCTTATTGCAAAATATCAGTGCAGAAACAATTCAAGCAGCAGCCTTGGGCTTAA  
ATTGGCCTAGAGGGTCTCCAGTGATTGAGAATGCAAGCGATCAATTCAACTCTTATTCC  
CTGCTTCAAGGCTCCGAAACTGTTGGACCTGTTTGGAAATCTTTACCAGTGATGTCAATA  
GATAATTCCACGGTTTCTCCAGCTGAACCAACTTGGAACGCGACATATCCCATGGAGC  
TCATGTGAATCAGGATCAGGTGCAGTTTCCGCAAACCTTGTGAGTGGATCAGGCAGAAA  
GTTATGCTAGATCTGCTCTTGCTTATGGTCAAGAAGCAATCGGAATTAGGGATCTAGGT  
AGCCATGATCATAAAAGCACAAACAAAGAGCTACCAAGAGCAGCGACTGGAAATATTCA  
AAGCGTTGCGGAACAGCTTGGAGAGCAAGAGTCATTCCAACACACTGGA**ATGGGGAGT**  
**GTATCCGCCAACGACAGCCATATGGTGCAGGGAGACCATGTGCAGCAAGTGGAGGC**  
**AGGAGCATGGGGAATCATGCCAGTGAGAATGATGGTGTGGTCAGAAGTGAGGAGG**  
**TCAATCAGCTTGGCAGCGGTGTATATGTTAACCAAGAGGAAATGTGTTTGGATGGATA**  
**CCAAAACCATTTGGGGATTTGCAGATACAGGAATTGACTGGCCTGTCAGCAGATGA**  
**AATGAATTATCTGGGGTACTGTGAGAGTCAGATTGAGAGCGTAAGAAACCAGGCAGG**  
**AGACATGCTCATGACTAATCCGGTGGATGGAAAGCAGCCTGAATTATCACAATCCGG**  
**GGAAGGACAGCCAGGAAAAGGGGCTCCAGAGCCTCAGGTCTTATCTCAGGAGATGG**  
**AAAGGTTGTTATCTGACAGAGATCGATTGTCAACGAAGCTCCTTTTCTGGAAGAGGGC**

CAGATTCAGGGCTAGACTCATTACCCATCCATTATTTCTCAACTCCTCAAGGCACAT  
GTAGACTGCATCCGTGTGATGACTCCAGCATCCAAGATACGTGACATCAATCTGCAG  
CTGGTTCAGGCTCAAAGTTTTTCGAATTTTTCTCCCGTTTGCGCCAAATGCCCCA  
GCCTGATGATTTTGAATTCGACTACTTCCTGGAAAATTTCTGGTTCGGATGAAACATT  
TCCAATCGAAATTGGAGATGCAGCTCAAGGTTACACCACTTTGGCTTACAGCAAATT  
ATGGCGCATCGAGCGGGTACTCGTCGACATGACAGGTCAGCGCATTCCCAGTCGGT  
GGATGATGGGCCTTATGTCTGACAACCCAGACAATAAAATTGGACTTCGGAAGGC  
TGTTGAAAGAGATGTTGCAAGTGTGTAGAAGAACGCTTGCGCGAGGATAATGGCAG  
TTCTAGCACTGACGATGACGATCTCAGTACTCAGACCTCGATACTGATATCCAGAAC  
GCCGATGACCCTGATCTCCCATGTGCAGACAATCCAAGTGAACAGTATAGCGATGAT  
GCTAATGTCGAGTTTATGGATGATCCTAGTCTCCAGAATGCCGGTGGTGCTAATGTCC  
AGTATGAGGATGATCCTCGCCTCCAAAACGCCGGTGGtgctattttccagtatgggaatgatcctag  
tttcaaagtgccggtgttctgatggcagtatgagcatgatcctagtctccagaatgcagggtgtcctgatgtccagc  
atggggatgatcctagtctccagaatgccggtgttctgatgtccagtatgacatgatcctagtctccagaatgccggt  
ggtgttattatccagtacgggggtgatcctagtctccagaatgccggtgtgtgatgtccagtatgacatgatcatag  
tctacaaaatgccagtggtgtctattgtccagtatgggggtgatcctagtctccagaatgctgggtgtcctgatgtccagta  
tgagcatgatcctagtctccagaattccggtgtgtctattatccagtatggggatcgtactagtctcgagaatactggtg  
tgctaagtccaatgtggattttccagtcctcagtgctgtgtgtccagttccagtatggggattatcctagtctcc  
agaatgccggtgtgtctaattttcaatgctgtgatcctagtctccagtatgctgggtgtgtaacgtccagtatactg  
ataatccgaatccagtataccggtgatccgaatgtgcagttgtgatgatgcgaatctccaatgtggcgtgattcta  
gctccagtacactggaaatccgaattccagtataccggtgatccgaatgtacagttgtagacgatcatactttccagt  
ttggagGTGATTTAATCTCCAGTTCGCTGATGATCAGAATCTCCAGTATACAGGTGATC  
CGAATCTACCGTTTGCTGATGACCCGAACGAACAGTATGGGGATGATCCTAATGTCC  
AGTATGTCGATGATCCTGATGTCCAGTCTGCTGATGACCCAAATTCTCAGTGTGCTGA  
TGATGCTGATGATGTTGAGCATGCTGGTGTCCGATGTCCAGAGCGCAATGGACTC  
GGACTATTTTGAACACTACTGTTCCAGATCGTGCTGTCATGGAGAGCATCAGGCGAGA  
GTTGATTGCATCACTTGGTTTTGAAAAGTACAAGAAGAAGATCAAAGAAGTGAGAGAT  
GAGATTTTGAAGAAACGAAGAGCGGGCAAATTGCCAGACGGAACACACAAATACTC  
AAGGCGTGGTGGGATGCTCATTCAAAGTGGCCTTATCCAACGGAAGATGAGAAAGAA  
GTTCTTCTCAAACGACGGGATTGGAACGAAACAATCAACAACCTGGTTCATAAATC  
AAAGGAAAAGAAATTGGCACAACAATCCACTGTCATCGAGCAATAAGGAGAAGCGG  
AAAGTAACTGTGACAGATGTGATGCAAGAGTAGATAACCATCCAGTCACACTAACAGT  
TA

>AXG93\_3769s1000|MpKNOX2\_cDNA\_long\_version\_translation

MGSVSANDSHMVQGDHVQQVEAGAWGIMPSENDGVVRSEEVNQLGSGVYVNQEEMCLD  
GYQNHCGDLQIQELTGLSADEMNYLGYCESQIESVRNQAGDMLMTNPVDGKQPELSQSG  
EGQPGKGAPEPQVLSQEMERLLSDRDLSTKLLFWKRARFRARLITHPLFPQLLKAHVDCI  
RVMT PASKIRDINLQLVQAQKFFEFFLPFAPKCPQPDDFEFDYFLENFLVRMKHFQSKLEMQ  
LKVHTTLAYS KLWRIERVLVDMTGQRIPSRLDDGPLMSDNP DNKIGLRKAVERDVASAVEE  
RLREDNGSSSTDDDDLSDSLDTDIQNADDPDLPCADNPSEQYSDDANVEFMDDPSLQNA  
GGANVQYEDDPRLQNAGGai f q y g n d p s f s a g v p d g y e h d p s l q n a g g p d v q h g d d p s l q n a g g s d v q y d  
h d p s l q n a g g g i i q y g g d p s l q n a g g a d v q y d h d s l q n a s g a i v q y g g d p s l q n a g g p d v q y e h d p s l q n s g g a i i q y g d  
r t s l e n t g g a n v q y v d f s s l q c a a g a s f q y g d y p s l q n a g g a n f q c v d d p s l q y a g g a n v q y t d n p n i q y t g d p n v q f v d d a n  
l q y g g d s s v q y t g n p n f q y t g d p n v q f v d d h t f q g G D F N L Q F A D D Q N L Q Y T G D P N L P F A D D P N E Q Y G D D  
P N V Q Y V D D P D V Q S A D D P N S Q C A D D A D D V E H A G D P D V Q S A M D S D Y F G T T V P D R A V M E S I R  
R E L I A S L G F E K Y K K K I K E V R D E I L R K R R A G K L P D G T T Q I L K A W W D A H S K W P Y P T E D E K E V L L  
K T T G L E L K Q I N N W F I N Q R K R N W H N N P L S S S N K E K R K V T V T D V M Q E

***S. pratensis* KNOX**

&gt;SpKNOX1|cDNA

ATAGGAAGCCTGGATAATATTAGTCGAGTTTCTAATCCAAATAATATCTTGCTGAATTT  
AACAGAGGATAAATTC AATGATGCTCTTTTGAGTAATGGCATACTTCTAATCTTCCGC  
AAACCATAGATAACTTGAGCCATGACTATAAATTTTCATGAACTCAACAACCTTTTCTTCA  
ATCCAACACTTCTGTTTCGATGAATGAGCATACCGCTCAAGACTCTCGGCTTGAATTTT  
CATGTCCGACCAGCTTAATGAATGACGAATTGCAAAACGTCGAGCGTGCTCTTTCTTG  
TAGAAATGATTCTACGTGTTTCGTCAAGTTTGCAGAATTTAGAGACGGGTTATCTTCCC  
AAACTAAGAACGGGTACTTACGCAGCTCAAGAAGAAACCACATTGACTGCTTTTCGAA  
AATGGCTTAAATAATGAACCTAATGGTTTGGTTTATAATTTTCGATTACGGAGCTAACCA  
AAACATTTATCAAGGTTTCGGCGGAGGTAGAAAACACCGAGGCTTCACATTTAGCAA  
CGCTTACCCAACCTGATTTCCACGTTTTTCAAACGTAACCAGACCTCACGTTCCGGGT  
GATGGCAATAATGGTTTTGAAAGACCCGAGCCTTTGGCAGCGCAGAAAGTTGATGAA  
GATGAAAAGATCAATGCTATCAAAGCTGAAGTTGTTTCTCATCTCTGTTTAATCAGCT  
ACTCGAGGCTCATGTGGCGTGTCTTAAGGTTGCAACGCCTCTCGATCAAATCCCCTTG  
CTAGACCTCCAATTAGAAAAGAAAAATCTCGTGATTGAAAAATATGAAAAATTTCTCA  
AGGACCCGAAGTATGGAAATTTTAAAAACAAAATCGAAGAAACAACCGAGCTTAATT  
TTTTTATGACGCATTTCTGTGTTTACTTCAATCTTTCAAAGCCAACTAGAGCAACAT  
GTATTGATTCAAGCCAGAGAAGCAGTAATGTCATGTTGGGAATTAGAACAATCCCTCA  
TTTCGTTAACAGGTATGGAGCCTCGACCTGGTACAGGATTAACCATGTCTGACGATGA  
TGATGACGACTTGGACGACGAGGATACTATTGATTATGATAAGCATGCTTCAGAAACT  
CTAACAGACGGAAATCAAGATCCTTATGGACCACTTACACCATCTGAAAACGAACGC  
AGCATTATGGAACGTATGAGGACGGAACCTTAAAAACAGTTATCAGATCAAGGCTAT  
CGTACCAAATAGCAGACGTGCGTGAGGAAATTATGAGAAAAAGAAGGGCAGGAAA  
GTTGCCTAGCGATACGACCCAAATTTTAAAGAGTTGGTGGAAATGCCCACTCAAATG  
GCCGTATCCTACAGAAGACGAAAAGACTACTCTGGTTCGGGAAACCGGTTTGGAACT  
GAAGCAGATAAACAACCTGGTTTATAAACCAGAGGAAAAGAACTGGCACAACAATAG  
CTCGCAGAGCAGGGGTTCAAACGAAAACCTAAAGGATGATAATGCCGGAGGA

&gt;SpKNOX1|translation

IGSLDNISRVSNPNILLNLTEDKFNDAALLSNGIPSNLPQTIDNLSHDYKFHELNNFSSIQHFC  
SMNEHTAQDSRLEFSCPTSLMDELQNVERALSCRNDSTCSSSLQNLETGYLPKLRTGT  
AAQEETTLTAFENGLNNEPNGLVYNFDYGANQNIYQGSAEVENTEASHLANAYPTDFHVFQ  
NVNQTSRSGDGNNGFERPEPLAAQKVDEDEKINAIAEVVSHPLFNQLLEAHVACLKVATP  
LDQIPLLDLQLEKKNLVIEKYEKFLKDPKYGNFKNKIEETTELNFFMTHFVCLLQSFKSQLEQ  
HVLIQAREAVMSCWELEQSLISLTGMEPRPGTGLTMSDDDDDDLDDEDTIDYDKHASETLT  
DGNQDPYGPLTPSENERSIMERMTELKKQLSDQGYRTKIADVREEIMRKRRAGKLPSDTT  
QILKSWWWNAHSKWPTYPTTEDEKTTLVRETGLELQINNWFINQRKRNWHNNSSQSRGSKRK  
LKDDNAGG

&gt;SpKNOX2|cDNA

TTTTCTTCAAAGCCTAAGCATAATTCATTAATTCGTTAAGATTAATTGCGCCCTTTCA  
ATCAAGACAGGACATGGATGAAGTCATTCAGCTTGACTGCTTAGAGAGAACAATAA  
TCTTAACGAATTTAATGAATTATGCTTAGGCTTTGAAGAAAACCTATTCTTTTGCTTCA  
CATTTGATTGTAATTTTTTTGAAAATCCATTTTCTCTTTCTACCGATCTAAGTGGAAGTC  
CTATGGCCGATGATCTTCTGCTATTAGATTACAACCTTTTTTCAATCATCTGAGATTCAA  
GGAATAAACATGGAAGAACTTATGAACAATTTTCTTTGATGGAAGAGGATCAAATA  
ACGCAAACCAAATAATAATCCAAAATTTTGTGGGTATAAAGAGCAAATTATTTACA  
CCCATTGTTTCTGACCTCGTTTCAAATTCATCGAATTACGCAAAGTAGGGGCACCT  
GAAGAAAAAATGAAAGAAGTAAAGAAATGAACGTGAAAGTCTTTTAAATTTAATGAATG  
GGAAAATGATGATGAATGATCATGATGAAAATTTGGATTCTTTTATGAATGGTTTTTTG

GTTCAATTGTCTGAATCGAAAGTTGAAATTCAAAAATCTTTGACGAGGCTACTAAATT  
TTGCTCAGATTTTGAGAAGAATATTTGCCAAAATTTGATGTCAAATAAAGAAAAAGAA  
AATGAAGAAGAGGATTTTCAAGACGTAGATCCTACCGCTGAAGACAGGGAATTGAAG  
GAGCAGCTGAAAAGAAAGTATAGAGCTTATTTGACGGGTTTAAACAAGAATTCTTAA  
AGAAGAGAAAGAAGGGGAAGCTTCCAAAAGAAGCCACCATGATTTTGCATAACTGGT  
GGTTTTCTCACTTAAATTGGCCTTATCCGTCCGACGCGGAGAAAACACAGCTAGCGG  
AAATGACCCGTCTTGACCCGAAGCAAATTAATAACTGGTTTATAAATCAACGGAAGCG  
ACATTGGAACAACGCACCTAACCCGAACCAACTTACGTTA

>SpKNOX2|translation

FSSKPKHNSLNSLRLLIAPFQSRQDMDEVIQLDCLERTNNLNEFNELCLGFEENYSFASPFDC  
NFFENPFLSLSTDLSGSPMADLLLLLDYNTFFQSSEIQGINMEETYEQFSLMEEDQNNANQNN  
NPKFCGYKEQIISHPLFPDLVSKFIELRKVGAPEEKMKELENERESLLNLMNGKMMMNDHD  
ENLDSFMNGFLVQLSESKVEIQKIFDEATKFCSDFEKNICQNLMSNKEKENEEDFQDVPDPT  
AEDRELKEQLKRKYRAYLTGLKQEFLLKRRKKGKLPKEATMILHNWWFSLNWPYPSPDAEK  
TQLAEMTRLDPKQINNWFINQRKRHWNNAPNPNQLTL

### *A. agrestis* KNOX

>AagKNOX1|cDNA

TCGAGGGCAGTCCTCTGGCAGACCGTGCTGCTGAGAGCAACAGGAGCCTGCTTCAGG  
CTGCTTTCCAGCCCGACCCTGCTCAAATGATCAAGCGTCCAACCTGGCTCGCCAATGC  
CGTTCTGCGACTGCAGGCACAGCAAGCTTCAGCAGCAGGGAATGGGACAGGAGAAT  
CAAATATGGGCTCAAATGGAAGCCAGGAAAATGGAAGCTACGGGGGGCACTGGCTT  
TCGATGCCTGTTGCACACTACGAGAATGGGAGCAACGGCAGTGCATCGCCTCCTCAG  
GGGGGAGATCTGGTGCAGCAGGGGTTCAAGAACAACCTCTATGTACAATGGATCAAGC  
TTGAGGACTCAGTATGACAGTGCTGAGAATGGTTATAGGCAAGGACACGGAGGAGAC  
GACAATGGTGTGGAGACAACAGCAGTGAGCCCAACCACGACACAGAGGACCAGGA  
GAACTGGGTGTTGGCAAAGAGAAAAGCGGATATTGTAGCGCATCCTCTGTTTCCCGA  
GCTTCTGTCTGCTCATGTGCTTGGCTTGGCGCATCGCGACACCTGTGGACCAGCTGGGA  
ACCATCGATGCACAGCTGTCGCGAGTCACACCTTGTAAATCAGCAAGTACCAGGCATTG  
AGCCTGGAATCACGACCAGAAGACAATCCAGACAAGGAGGAGCTGGAGCAATATAT  
GGCAGACAACGTCATGCTGCTCCGTTCTTTCAAGGACCAGCTGCAGCAACACGTTCCG  
AGTACATGCCATGGAGGCTGTAATGTCTTGCTACGACCTGGAGAAGCAACTTGAAGA  
GCTGACTGGCGTTCGGGCAGGTGAATCTGGACAAACCTCTGGTTACCTGATGTCAGA  
TGACGAGGATGACGCACATGGAGATAGTGATTTATCTGCTTATGATCCAGCCTGGAT  
GGGGCCGAGAATGGGGGCTTCGGGCCATTGATACCTACTGAAACAGAGCGCACTCT  
CATGGAACGCGTGCGGCAGGAGCTTAAGGCAGAGCTCAAACAGGGATACAAAGCCA  
AGATCATAGATGTGAGGGAGGAGATACTGCGAAAGCGTCGAGCCGGCAAGCTGCCA  
GGTGATACAACTACGGTGCTGAAAACATGGTGGCATGCGCATGCTAAGTGGCCCTAC  
CCTACGGAAGACGAGAAGGCACGCCTGGTGCAGGAGACTGGTCTGGAGCTGAAGCA  
AATCAACAACCTGGTTCATCAACCAGCGCAAACGCAACTGGCATGCTAATCCTTCTGCT  
GCAGCCGCAGCCAAGACTAAACGCAAGAGCTAGGTTTGTGATCTTGTGAAAAGGAT  
GCTAGTACTTGTGTTGCAGGTGACAACCTCCTGTACTTCTAGCAACTCATCCAACGACG  
GAGCTTGCAGCACTTGAATG

### *S. kraussiana* BELL

>SkBEL1.genomicDNA

TAATAGAATTTGGAAATTAATTAACCGGCAAGAATCTTATAGAAAGTATTTACTATAATAAC  
TCTTATCATGCTCCAGTATGGATCTACCCAGGAAGGTAGAACCTGGACGTTAAATTTA

CATCAATCCATCCATCTAATAAAATATTA AAAATATGTCTAGATTGGGGGGAGAAAGAAC  
ATGTTCAATGTAATGACAAATGGGAAATGTGGAAGCTGAAAGATATGTTCCAACGAGAG  
GAGCAGACAGAAGCAGACATGGATAATGTGAAGCTCATCGAACCCGTAAGAGAGAGAG  
AGAGATTTCTTTTATCGTCCACGGGAACCCAACAGGGTTACGGGACACTCATATAATAC  
AAAGTATGGGATATGGACATTGGCTTTTGAATCTGTACTGGCGTTTCACAGCTGGATT  
AAAAAACCCCCACCCCCCGTAGAGTTAATAGTGAGGGAAAAACCGTGCTTGAAACCTTG  
TTGAACCAGACAGGATATAAGTGCTTGTTGTGTACCTTGATTGCCATCATGATGTAAGC  
CTAGTACCATATCCCTGTCAGTCAACATTCAACCTCTTCTAGAAGACTGAAGTTCTTGCA  
TCTCTCAGATATCGGACTCCGGCTGCTGGAGCTCAAGGTTACGGAAGCTGGAGAAACG  
GGGACGAGCTGATGTTNANGNGGGGAAGCGAGCGGGCCAAGAGCTTCGGCAACAATC  
AGGAGAGCAGCCcctgagtcgtATAAATGAGNTTGGGNATACGGTATACGCGAAACACCGT  
CTTTGGGAGGACAGCAACACCAGCTTCTGCCGGTGGAAAACCTCGCAGGCGGGGTGGAA  
CTCCGGGGTACCAATCTCTCTCGCTTACGCTTTCTTCACAGCAGCCTCAAGCCCTACCG  
GGTTACGACGTTTTGAGCCAGACGGCCGGGCTCGAAAGTCCGGCGATGTCTCAGGAT  
**GGAAAGAGGCAGATTAGTGGGAAGCTTAGTGGTGATTAAAGCCACTTTCGACGCGAT**  
**TTTGGGTCCAGCAAGTCGGTTCAAATCGACTCCGGAACGTCGGCTATGTCCGGCAGC**  
**TTCAGCATCATCTCCAGCAGTCGGTATCTCAAGGCATGCCAGCAGCTCCTTGAGGAA**  
**GTCTGTAGTGTTGGACGAGGGACGAAGAATGGGAAGCCGAGGACGGCTGCTGGGCC**  
**TAGTCCGTCCTTGACGAGTCCGACTTCGGGTGGCCGAGATGAGAACTCGTCCGGAGC**  
**CAAAGACAATAGTACAGGCGGTGCTACTACCGCGACCAATGCCGCGACTGCAGCTG**  
**CTACAACCACGAGCGCAGGCCCCCGCAGTTTCTTCTCCGAAAACCAAAGGTCCGACTG**  
**TACTGCACCGGCGACGTGACCTCGGAGCCGGGGGAGTCCGCGAGTACGCTCACC**  
**ACCGAGGAGAGGCAGGAGTTCGAGCTCAAGAAGTCGAAACTCATTGCGATGCTTCAA**  
**GAGGTACGTTTACCATTGCAANGTACATATACGTAGTATACTTAACCTTTTGAATACGT**  
**ATTTTCAGGTTGATAGACGATACAGACAATAACAACGATCAGATGCAAGTTGTGATCAG**  
**CTCGTTCGACGCCGTAGCCGGCACGGGCTCAGCAACTCCGTATACGGCACTGGCTCT**  
**ACAAGCCATGTCTCGCTACTTCAGGTGCCTCAAGGATGCGATCACAGGGCAGATCCA**  
**ACTCGTTTGCAAAGCTCTCGGCGAGGAGGACATCTCGAAGCAGCTCACCACCAAAG**  
**TCCGACTTCGAGACTGCGGTTTCATCGATCAGCAGATTTCGACAGCAGCGAGCTTTCCA**  
**GCAGCTGGGGATGCTCAACCAGCACGCTTGGAGGCCCAACGAGGACTTCCCGAAC**  
**GCTCCGTCTCCATCTTGCGAGCTTGGCTCTTCGAACATTTTCTTCACCCGTGAGTATNT**  
**ATTTATCTTTTAAGTAGTATTTAGAGTAGTATTTATTTTTATAGTGGTTTTTTCGCAGGC**  
**GTTACGTTTCCCTTAGATTTTGAAGCCTGTCATTCTTGCATAATTTGTCTTTACATTGT**  
**TGGCTGCCTAGATTTCTCGCATGATTTTTCGAGCTCAGTTTTTATTGATTTTTTCAAGT**  
**ATCCAAAAGACGCAGACAAGATGATGCTTGCCAGGCAAACCTGGTCTCACGAGAAGCC**  
**AGGTAATGATACGTAACGGCTGTATTTTATACGTATTTTCGTATCTGACGGTGTATTATT**  
**GTACCCAGGTTTCTAACTGGTTCATCAACGCGAGGGTGAGGCTGTGGAAGCCAATG**  
**GTGGAGGAAATGTACCAGGAGGAGACGAGAGATCACGAACTCGATGCAGCGGTTTC**  
**GAGGATGCATGCCGAGAACGAAGAAGCGGCGGCCGAGCTGCAGCCGGTTACCATC**  
**ATCGTGTCGGAGATGCAGCAACCGGTGGTGACAAGTTGGATCAGCAGCAGCAATCC**  
**GGTCTCGGAGACAAGTCCAAAGATCTCGACTACGTGAGAACTCGGACTATCTGAGG**  
**TCCAAGCAGAGCTTGAACCTCATGCATCAGCATCCGGGGGACTCTCAAATGTACGAG**  
**ACGCAGCAGCAGCAGATCAAGAGGTCGAGGTTTGGAGCTCACGAGAATAATGAAAT**  
**GTTGCAGCTTCCATCTTCGAACTCGGCGAGCATGGACGTTGAGATGAAGCCGGACGT**  
**GCTACCGGAAGCTCACCACCATTTGCACCACCACCACTTGCTGCCTCAGGCCCAACA**  
**GCAGCAACAGCACGGGTTTGGGTACGACGGTCTTCGTTTTCAACGCCGGTGCCGGATT**  
**CGGCTACAGCCATCCGGCAGCAACAAGCGGGGGTGTTCGCTCACTCTTGGTTTGCA**  
**GCACAGTGAGAACAACAGTGGATTATCTACCGGAGCTTATAGACAGGCTTTTCTCAA**  
**CACCAACAGCAGCAGCAGCAGCAGCAGCAGCAGCAGCAGCAGCAGCAGCAGCAGCAGC**  
**GATTTCAATGATCACTTACACATTTAATAGAAAACCTCCTTGAGTCGTCTATTGATTGAT**  
TTGTAGATCTGTGGAAGATCGACAAAATGGGATTTCAAGGTCCTATATAGGTGGATTCC  
GAGAGGTTATGCCAATACGAGGGCGGTTTCATAATAGGCTTTCATAATTGGAACATGGT

GATGGAGGTACACAAAGAATGACAGGCTTGCAAATCACAATGTAGTAGTTTCCATTAGA  
GTAACACATTGTACACATGGTAAAAAATAAATAAATAAATAAATAAATAAATAAATAAATAA  
GTTTTAATTAATATACATTTTCTAATAGAATTTGGAAATCACTTACATTAAGTATTTACTAT  
AATAACTCTGGTATTATCATAATGCTCATTATGATAATACCATTACCCTGTTGAAGGTATG  
ACCTCGACATAAAAATAAACAAATCTATCTATTAGATTAGATATTTTTAATAAAAATATTTAA  
AATACTGCATTATATGTCTAAATTGAAGAGTCTAATAAAACACTGACATTTTTTTCTTGAC  
CCAATAAAAACCTTCTTTTTCACTTATATAATTTAATTTATATAATTATATAATAAATTGA  
ATTATCTTTTAACTTATACAGGTTATATTTAGAGCCCGNTNCTCAAGCATACGCAAAGA  
ATGAAATCACAAAGTACACATAGTGGTTATGTATTAATTAATATACACACTTACTAATAGA  
ATTTGGAAATTACTTACCGGCAAGAATCTTATAGAAAGTATTTACTATAATAACTCTTATC  
ATGCTCCAGTATGGATCTACCCAGGAAGGTAGAACCTGGACGTTAAATTTACATCAAT  
CCATCCATCTAATAAAAATATTAATAAATATGTCTAGATTGGGGGGAGAAAGAACATGTTCA  
ATGTAATGACAAATGGGAAATGTGGAAGCTGAAAGATATGTTCCAACGAGAGGAGCAGA  
CAGAAGCAGACATGGATAATGTGAAGCTCATCGAACCCGTAAGAGAGAGAGAGAGATT  
TCTTTTATCGTCCACGGGAACCAACAGGGTTACGGGACACTCATATAATACAAAGTAT  
GGGATATGGACATTGGCTTTTAAAATCTGTACTGGCGGTTACAGCTGGATTAAAAAAC  
CCCCACCCCGNAGAGTTAATAGNGAGGGAAAAACCGNGCTTGAACCTTGTTGAA

>SkBEL1.cDNA

**ATG**TCTCAGGATGGAAAGAGGCAGATTAGTGGGAAGCTTAGTGGTGATTTAAGCCAC  
TTTCGACGCGATTTTGGGTCCAGCAAGTCGGTTCAAATCGACTCCGGAACGTCGGCT  
ATGTCGGCGAGCTTCAGCATCATCTCCAGCAGTCGGTATCTCAAGGCATGCCAGCAG  
CTCCTTGAGGAAGTCTGTAGTGTGGACGAGGGACGAAGAATGGGAAGCCGAGGAC  
GGCTGCTGGGCCTAGTCCGTCCTTGACGAGTCCGACTTCGGGTGGCCGAGATGAGAA  
CTCGTCCGGAGCCAAAGACAATAGTACAGGCGGTGCTACTACCGCGACCAATGCCG  
CGACTGCAGCTGCTACAACCACGAGCGCAGGCCCCCGCAGTTTCTTCTCCGAAAACCA  
AAGGTCCGACTGTTACTGCACCGGCGACGTCGACCTCGGAGCCGGGGGAGTCCGCG  
AGTACGCTCACCACCGAGGAGAGGCAGGAGTTCGAGCTCAAGAAGTCGAAACTCATT  
GCGATGCTTCAAGAGGTACGTTTACCATTGCAAGTACATATACTTAGTATACTTAAGC  
TTTTGAATACGTATTTTCAGGTTGATAGACGATACAGACAATACAACGATCAGATGCA  
AGTTGTGATCAGCTCGTTCGACGCCGTAGCCGGCACGGGCTCAGCAACTCCGTATAC  
GGCACTGGCTCTACAAGCCATGTCTCGCTACTTCAGGTGCCTCAAGGATGCGATCAC  
AGGGCAGATCCAACCTCGTTTGCAAAGCTCTCGGCGAGGAGGACATCTCGAAGCAGCT  
CACCACAAAAGTCCGACTTCGAGACTGCGGTTTCATCGATCAGCAGATTTCGACAGCA  
GCGAGCTTTCAGCAGCTGGGGATGCTCAACCAGCACGCTTGGAGGCCCAACGAG  
GACTTCCCGAACGCTCCGTCTCCATCTTGCGAGCTTGGCTCTTTCGAACA**TTTTCTTCA  
CCGTATCAAAGACGCAGACAAGATGATGCTTGCCAGGCCAACTGGTCTCACGAGA  
AGCCAGGTTTCTAACTGGTTCATCAACGCGAGGGTGAGGCTGTGGAA**GCCAATGGTG  
GAGGAAATGTACCAGGAGGAGACGAGAGATCACGAACTCGATGCAGCGGTTTTCGAG  
GATGCATGCCGAGAACGAAGAAGCGGCCGCCGACGCTGCAGCCGGTTACCATCATC  
GTGTCGGAGATGCAGCAACCGGTGGTGACAAGTTGGATCAGCAGCAGCAATCCGGT  
CTCGGAGACAAGTCAAAGATCTCGACTACGTCGAGAACTCGGACTATCTGAGGTCC  
AAGCAGAGCTTGAACCTCATGCATCAGCATCCGGGGGACTCTCAAATGTACGAGACG  
CAGCAGCAGCAGATCAAGAGGTTCGAGGTTTGGAGCTCACGAGAATAATGAAATGTTG  
CAGCTTCCATCTTTCGAACTCGGCGAGCATGGACGTTGAGATGAAGCCGGACGTGCTA  
CCGGAAGCTCACCACCATTTGCACCACCACCTTGCTGCCTCAGGCCCAACAGCAG  
CAACAGCACGGGTTTGGGTACGACGGTCTTCGTTTCAACGCCGGTGCCGGATTCCGGC  
TACAGCCATCCGGCAGCAACAAGCGGGGGTGTTCGCTCACTCTTGGTTTGCAGCAC  
AGTGAGAACAACAGTGGATTATCTACCGGAGCTTATAGACAGGCTTTTCTCCAACACC  
AACAGCAGCAGCAGCAGCAGCAGCAGCAGCAGCAGCAGCAGCAGCAGCAGCAGCAGCAGC  
CATGA**ATCACTTACACATTTAATAG**AAAAAAAAAAAAAAAAAAGTCGACATCGATACGCGT  
GGTCATCTGC

>SkBEL1.protein

MSQDGKRQISGKLSGDLSHFRRDFGSSKSVQIDSGTSAMSASFSSIISSSRYLKACQQLLEEV  
CSVGRGRTKNGKPRTAAGPSPSLTSPSTSGGRDENSSGAKDNSTGGATTATNAATAAATTTT  
AGPAVSSPKTKGPTVTAPATSTSEPGESASTLTTEERQEFELKKSCLIAMLQEVRLPLQVHIL  
SILKLLNTYFQVDRRYRQYNDQMQVVISSFDAVAGTGSATPYTALALQAMSRYFRCLKDAIT  
GQIQLVCKALGEEDISKQLTTKSPTSRLRFIDQQIRQQRAFQQLGMLNQHAWRPQRGLPER  
SVSILRAWLFEHFLHPYPKDADKMMLARQTGLTRSQVSNWFNARVRLWKPMEEMYQEE  
TRDHELDAAVSRMHAENEEAAAAAAGYHHRVGDAAATGGDKLDQQQQSGLGDKSKDLDY  
VENS DYLRSKQSLNSMHQHHPGDSQMYETQQQQIKRSRFGAHENNEMLQLPSSNSASMDV  
EMKPDVLP EAHHLHLLPQAQQQQHGFYDGLRFNAGAGFGYSHPAATSGGVSLT  
LGLQHSENN SGLSTGAYRQAF LQHQQQQQHDYASFENASLIS\*

>SkBEL2.genomicDNA

TNNCAANCNAATGTCACNTCAATANAGTCTCNCTCCGNTCNGATCNGTTCGTTATGTNA  
NCCNTCGNTGACCACTGGNANTCGAGGCTAGACCGACCGTCTTTTGGAGTANGTGCCC  
GAGACAGCCCCAGACACTGACTGCCGAAAGNNTCAAGCNCNTCATGCCACCCCAGAC  
ATGNCNGTGTGTCGAGCCCACCACCACCAGGTCACCACCACCATCACCAGATCAC  
CAGAGNTACNGTACTACNGTAACATGATGAAGAAAACCCGGTTGGGGGGGATCCACG  
ACTCTCTGGGAATGCTGGACGCTGGTGGTAGTACCATGGATGTCATGGAAGTCAAGGA  
TGGTGATGGTAGTATGGATGGCAGTAAGTATGGGGCGTATATAACAACATGATCAGCAG  
GCTCAGAACTACGGAGTTCATCAGACTACGGTGGATAGCTACGGTAGATACGGCGGTG  
CACCGTCGGGTGGTGGAGGGTACGCTACGCAATACCCCGGGGGTAGTGGGGTGTCCC  
TCACACTCGGACTACGGCATTGCGATAATCTTCATCTCGCAGCTGCTGCTGGGCCTCAT  
CAGTTCTTGCAGCAAGGAGGACAGAACTTTCTGGCCGCTGCCGGACGTGGTGCGATCT  
CGGCGTCGGATGGAAGTGAGCTTTGTAACATCTACGGAGCGGCGGGCGGCTGCTGCTG  
GTGGCGGTGCTCACATTCACATCGGAGAGCACGATGGTATGGACTACCAAGGCAGGAA  
GCAGCAGCATATGGAAGGCCACCTCTTGCATGACTTTGTGGCATGAGAAAAACATGCAT  
TTTTCTGCAGCTAGCTTCGTCCATTTTCAGGAGGATGTCACAGCAGAGCTGCAAAACAT  
TGGTGGTGGCCTTGATTGAGCTCGCGAAAATTACTTGTATTACTTCAGCAGCAACATTG  
GCTGTAAAATCCATACGACTATAACCACGACGGCGTAGTATGCTTGTATGTACACACACC  
ACATTGAGAAATGTCGGAAGTTGTTTCATCTGCAAGATGGGAGGAATGCGCCACCGCAG  
AAGAACGCTGTTGCAATGTAGCAGATGATGATGACTGTTATGATTAGAAGTATCCTGGA  
AATTGTTGCCGTATGTGAGGGGATATACGATGGTTTTTCTACGATTTACTTACACTAG  
CTTGCACGTATTCATGCCTTGTGTCCGTGCAATCTTCCGAGCTTGTGCGGAATCTTAA  
GGAATTTTCTTGTATGTGTGATGCTTGTCCACCAGGAGCTCTAGCCTATCACCACGTT  
**CCAAGATCTTGTGATGTTTTGAACCATCACCGCTCGAACCTGACATGTGTA AAAAGCT**  
**ATAGTAAAACCATTGAAAAAACTGGAGCCTTTCTCAACTAAACAATATTGAAAACATG**  
**TAAAATTATGATCCAGGTATGAACTAAANCCATTGAAAGAATGGGAGCCTTTTAACCA**  
**TTCACTATTGAAAACACATAAAATTCNTCTTGAAAATATGGTAGCTCTGAAAACATGA**  
**CATTGTCAAGTTCTTTGCATTCTCAAGTGCTCGAATAAACTTTTACTCTTGAAAACA**  
**TGAGCTATGGAAAAACACCTAAAAACGAGAAGCACTCTTGAAGTGCTCTAAAAACT**  
**TAGCTTTTGGAAAGCTCAACTGTTGAAAACCTAGAGACAATCATGAAAACATGAGTTT**  
**TTTGGAAAGCCTCAAGTGCTTGAAAACACCTAAAATCTAACAACTTACATCCGTGA**  
**TTTCTCCTTTGACACGATTAATGATGTCTGCCTGAGGATCGTTGAGAAAGTGATCCAT**  
**CTTCTGGTGCAAACTCTCGAGTACCTTCAGCTTTGTGTCCGGCAGCCGATACCTTAG**  
**GGCGGCGCAGCAGCTCCTCGACGAGGTCTGCAGTGTCCGACGAGGCCTGAAGGGGT**  
**CCAAGGCTGGTAGGGGCTCGCAAGGTACCGGTGGTAGCCCAACTGCCATTACCAGC**  
**GGTTCTGCACGAAAGGAGGTGACTACTGGTGTAAACCACCGAGAACAACCTCGGTAAA**  
**AGCGAAGTTACCATGGGATCATCGGTGGTGCCTAGTCCCTCCGGACCGTCAGCTGCA**  
**GCAGCTACGTCGAGCGTGGTTGCACCGTCAATACCACCGCCGAGAGCAGGGACAA**  
**CGTCGCGGTATTA ACTCCCGAGGAGAAGCAAGACCACGAAGGGAAGAAAACCAAGC**



TTTTGGCTATGCTTCAAGAGGTATGGATTTCGTAGTTGAGCGCTGATGACGACGGGCCA  
TTGAGTTTTGTAGTATTTCTCAGGTTCGATCGACGGTATAGGCAATACTACGATCAAAT  
GCAGGTGGTCATAACTTCGTTTCGATACGGTAGCTGGTGGTGGAGCTGCTACACCGTAT  
ACCGCACTTGCTCTACAAGCAATGTCCCGGTATTTTCAGGTGAGCTTTCATCGTACAAA  
TACATGCGAATTTTCGTAGTTTCATACTCTCGGTATATTGATTTTTCTACGGTTTTTTTCAG  
GTGTTTTCGAGATGCCATTACCGGGCAAATACAAATAACTTGCAAAGCTCTCGGTGA  
GGAGGACGTAACAAAGAGCATCACCAGCCGGCCGCTAACTTCGAGACTACGGTTCAT  
CGATCAGCAAATACGGCAGCAACGAGCATAACCAGCAATACGGGATGCTTCAACAACA  
TGCCTGGCGGCCGCAACGAGGATTACCCGAGCGTTCGGTCTCTATACTGCGAGCCTG  
GCTTTTCGAGCACTTCTTCATCCGTAAGCATATTCGTATATATTCGTATGTATTCATGT  
AATATACGGTTGGTTGGTGGTTCAGGTACCCGAAAGATGCCGACAAAATGATGCT  
GGCTCGGCAAACCGGTTTTGACACGGAAGTCAAGTAAGTGATTCCATTCCAGCACGTT  
ACCACGTTGCTTACCATGGTAACTACCACGGCTCTGCAGGTTTCTAATTGGTTTATAA  
ATGCCAGAGTCCGGCTTTGGAAGCCAATGGTAGAGGAGATGTATCAGGAAGAGACTA  
AAGAACACGAACTCGGTACTTTCGTCTGTGAGGCTGAGCGTTGACACCGAGGACAAGC  
ACCACCAGGACAACATGGACTTGCACGAAAAGCTATCAAAGCACCATCATGACCACC  
GCCAGGACATGGCCGGTGTGGTTCGAGCACCACCACCACCAGGGTCCACCACCAC  
CATCACCAGATCACCAGAGTTACGGTGACTACGGTAACATGATGAAGAAAACCCGG  
TTGGGGGGGATCCGAAGAGGTCTGTGCAAAGCTTTCCAGCGATCTCAGTCACTTTC  
GGACCTCGCCCAGGGACACCCTCGCAGGTGAGGGTTTGATTGGTGTTTTTAAGTGGTTA  
CGTTGGCTCCAGTGTGGTTTTACTTGTCTGTAGTTTTTGTGTTGTGTTATTGATTT  
TTACC

>SkBEL2.cDNA(predicted)

ATGTCTTGTCCACCAGGAGCTCTAGCCTATCACCACGTTCCAAGATCTTGTGCATGTT  
TTGAACCATCACCGCTCGAACCTGACATTGATCCATCTTCTGGTGCAAACCTCTCGAG  
TACCTTCAGCTTTGTGTCCGGCAGCCGATACCTTAGGGCGGCGCAGCAGCTCCTCGA  
CGAGGTCTGCAGTGTCCGACGAGGCCCTGAAGGGGTCCAAGGCTGGTAGGGGCTCGC  
AAGCAGCTACGTCGAGCGTGGTTGCACCGTCGAATACCACCGCCGAGAGCAGGGAC  
AACGTCGCGGTATTAACCTCCGAGGAGAAGCAAGACCACGAAGGGAAGAAAACCAA  
GCTTTTGGCTATGCTTCAAGAGGTTCGATCGACGGTATAGGCAATACTACGATCAAATG  
CAGGTGGTCATAACTTCGTTTCGATACGGTAGCTGGTGGTGGAGCTGCTACACCGTATA  
CCGCACTTGCTCTACAAGCAATGTCCCGGTATTTTCAGGTGTTTTCGAGATGCCATTAC  
CGGGCAAATACAAATAACTTGCAAAGCTCTCGGTGAGGAGGACGTAACAAAGAGCAT  
CACCAGCCGGCCGCTAACTTCGAGACTACGGTTCATCGATCAGCAAATACGGCAGCA  
ACGAGCATAACCAGCAATACGGGATGCTTCAACAACATGCCTGGCGGCCGCAACGAG  
GATTACCCGAGCGTTCGGTCTCTATACTGCGAGCCTGGCTTTTCGAGCACTCCTTCA  
TCCGTACCCGAAAGATGCCGACAAAATGATGCTGGCTCGGCAAACCGGTTTTGACACG  
GAAGCAGGTTTCTAATTGGTTTATAAATGCCAGAGTCCGGCTTTGGAAGCCAATGGTA  
GAGGAGATGTATCAGGAAGAGACTAAAGAACACGAACTCGGTACTTTCGTCTGTGAGG  
CTGAGCGTTGACACCGAGGACAAGCACCACCAGGACAACATGGACTTGCACGAAAA  
GCTATCAAAGCACCATCATGACCACCACCAGGACATGGCCGGTGTGGTTCGAGCACC  
ACCACCACCACCAGGGTCCACCACCACCATCACCAGATCACCAGAGTTACGGTGACT  
ACGGTAACATGATGAAGAAAACCCGGTTGGGGGGGATCCGAAGAGGTCTGTGCAA  
AGCTTTCCAGCGATCTCAGTCACTTTTCGGACCTCGCCCAGGGACACCCTCGCAGGTG  
AGGGTTGATTGGTGTTTTTAAGTGGTTACGTTGGCTCCAGTGTGGTTTTTACTTGTTC  
TGTTAGTTTTTGTGTTGTGTTATTGATTTTTACCAAAAAAAAAAAAAAAAAAAA

>SkBEL2.protein(predicted from cDNA)

MSCPPGALAYHHVPRSCRCFEPSPLEPDIDPSSGAKLSSTFSFVSGSRYLRAAQQLLDEV  
SVGRGLKGSKAGRGSQAATSSVAPSNTTAE SRDNVAVLTPEEKQDHEGKTKLLAMLQE  
VDRRYRQYYDQMQVVITSFDTVAGVGAATPYTALALQAMSRYFRCLRDAITGQIQITCKALG

EEDVTKSITSRPLTSRLRFIDQQIRQQRAYQQYGMLQQHAWRPQRGLPERSVSILRAWLFE  
HFLHPYPKDADKMMLARQTGLTRKQVSNWFINARVRLWKPMVEEMYQEETKEHELGTSS  
VRLSVDTEDKHHQDNMDLHEKLSKHHHDHRQDMAGVVEHHHHHQGHHHHHQDHQSYG  
DYGNNMMKTRLGGIRRGGLCKSFPAISVTFGPRPGTPSQVRV
