# Supplementary material for: Nonreciprocal complementation of KNOX gene function in land plants
Source: PubMed Central journal article supplement (PMC5637896; doi:10.1111/nph.14318), 2016-11-25
Supplement: NPH-216-591-s007.pdf [file NPH-216-591-s007.pdf]

**Supporting Information Notes S5** Edited KNOX alignment.

>kf100118\_0070

-----TCGTACCCCAAGCTTATCGCAGCTCATGTAGCCTGCGTGCAGATGGACA  
CCTCCTCGCCGCGGCTGTATCAGCTGGAGCTGGACCTGGCAGCCGCCATGGGAGCATCgGAGC  
AGCCGCGCCGAGGTGGATGCGTTCATGGCAGAGTGCTTGGCTCAACTGGGGCGGCTCAAGGC  
GGCTCTCGAGAGCCACATCTCC-----GCAGCTCTGCGGTCTGTGAGGTGTTGGAGCAAAGAC  
TAGTGGACGCTTTGGGCCACCGTGCACCCGAACCCGCGGTGGCGGCCAGCATGGCCAAGGAGC  
TGCGGCACAAGCTGAAGAAACAGTACAGCGAGACCCTGGCGGAGGTGCACAAGGAGATCTTGCG  
CAAGCGGCAGGCGGGGCGGCTGCCCGGCGACCAGGGGCACCTGCTCAAGGACTGGTGGAGGC  
GCCACGAGAGCTGGCCCTACCCACGGATGACGAGAAGCAGGCCCTCGCAAGGCAGACGGGCC  
TGCAATGAAGCAAGTCAGCAACTGGTTCATCAATCAGCGaaAGCGGAAGTGGAAACAC-----

>kf100113\_0180

TACCCCGAGGCAGACGCGATTTCGACGCCACGATAGGTATCCGGAGCTGGTTCGGCCGTTGATGG  
ACTGTTTGAAGTCGGCGCGTTCGAAAACGAGATCCGACGGCTAGACGCGCATCGGCGGTGCCT  
GGTGGAGGAGTCCCGGGCGCGCAGCCCGGTTAGATAAGGTTATGGAGGTCACGTGCCAGCA  
GCTCGTGGCGCTCAAGCAGCAGCTGCAGCAGCCGTTTCGAC-----GACGCGAACGCGTTCTGC  
AGTGACGTCGAGCGGCGCCTCGCGGAGATCGGGCTCTCCCGGGCGCTGGTGGGCGCGGCCGG  
CCCGGCCGACATGGGCGCGCTCAAAGCGCGCATGATCGCGCTGCACGGGCCCGCGATCGCGCG  
CATGGACATCGACACGTGGAAGAAGGAGCCGAAGGCGCGCCTGCCGGCCCGCGCATCAAGGT  
CATGCGCGGCTGGTGGGCCAAGCACCAGGACTCGCCGTATCCTGCGGAGAACGAGAAGCAGCG  
GCTGGCGAAGCGCGCGGGCCTCGAGCTGCAGCAGGTCAACAACCTGGTTCATCAACGAGCGGAAG  
CGCCACTGGACCAAGGCCGAG

>AaKNOX1

agcgatatgggagagcaggtgataatgcatcctttgtacccggacctggttaaaggctataatggactgtcgaaaagtggggaatggacgagt  
ctagacaccacatccaatccgcaccgaataagtgtggaagatttacgcgctagacccccgaactcgaccaatttctacgacaatacatcca  
agtactcgacgaactgcacgcagagctcctaaacattaaccga-----gaagcggacaacattttacacatgttcacgacctaataatagcg  
gaggtcatcaacatgccatggacatgacctggttcgaaattcgcaacgaacaagaataacgcggtgctcctcaaaaaaatatcggtaggaa  
ctcctagctttaaagaagagttttcgaaacgtaaaaaacgtggcaaatggccgacgcattcgatcgaggttttaaaaagtggggaaggaaca  
catcgcggtggccatctaccgatagcgcaaaaacggtcattggcctcttaaccaatttaacgtctattcaaatataatgggtcattaatcaacg  
caagcggcattggcacaactttt

>AagrestisKNOX

GCAAAGAGAAAAGCGGATATTGTAGCGCATCCTCTGTTTCCCGAGCTTCTGTCTGCTCATGTTCGCT  
TGCTTGCGCATCGCGACACCTGTGGACCAGCTGGGAACCATCGATGCACAGCTGTGCGAGTCAC  
ACCTTGTAATCAGCCCAGACAAGGAGGAGCTGGAGCAATATATGGCAGACAACGTCATGCTGCTC  
CGTTCTTTCAAGGACCAGCTGCAGCAACACGTTTCGAGTACATGCCATGGAGGCTGTAATGTCTTG  
CTACGACCTGGAGAAGCAACTTGAAGAGCTGACTGGCGTTTCGGGCAACAGAGCGCACTCTCATG  
GAACGCGTGCGGCAGGAGCTTAAAGGCAGAGCTCAAACAGGGATACAAAGCCAAGATCATAGATGT  
GAGGGAGGAGATACTGCGAAAGCGTTCGAGCCGGCAAGCTGCCAGGTGATACAACTACGGTGCTG  
AAAACATGGTGGCATGCGCATGCTAAGTGGCCCTACCCTACGGAAGACGAGAAGGCACGCCTGG  
TGCAGGAGACTGGTCTGGAGCTGAAGCAAATCAACAACCTGGTTCATCAACCAGCGCAAACGCAAC  
TGGCATGCTAATCCT

>AtKNAT1

GAAGCCATGAAGGCTAAAATCATTGCTCATCCTCACTACTCTACCCTCCTACAAGCTTACTTGGAC  
TGCCAAAAGATTGGAGCTCCACCTGATGTGGTTGATAGAATTACGGCGGCACGGCAAGACTTTGA  
GGCTCGACAACAGTCTAGAGACCCGGAGTTAGATCAATTCATGGAAGCATACTGTGACATGTTGG  
TTAAATATCGTGAGGAGCTAACAAGGCCATTTCAG-----GAAGCAATGGAGTTTATACGTCGTA  
TTGAATCTCAGCTTAGCATGTTGTGTCAGAGTCCCATTTTACCGGAAATAGACCCGAGGGCCGAAG  
ATCGGGAACCTCAAGAACCATTGCTGAAGAAGTATAGTGGATACTTAAAGCAGTTTGAAGCAAGAAC  
TATCCAAGAAGAAAAAGAAAGGTAAACTTCCTAAAGAAGCACGGCAGAAGCTTCTCACGTGGTGG  
GAGTTGCATTACAAGTGGCCATATCCTTCTGAGTCAGAGAAGGTAGCGTTGGCGGAATCAACGGG  
GTTAGATCAGAAACAAATCAACAATTGGTTCATAAACCAAAGAAAGCGTCACTGGAAACCATCTGA  
A

>AtKNAT2

AGTGTTCATCAAATCCAAAATCGCTTCTCATCCTTTGTATCCTCGCTTACTCCAAACCTACATCGATT  
GCCAAAAGGTGGGAGCGCCTATGGAAATAGCGTGTATATTGGAAGAGATTCAGCGAGAGAACCAT  
GTGTACAAGAGAGGAGCTGATCCTGAGCTTGTATGAATTCATGGAACCTACTGTGATATATTGGTT

AAATACAAAACCGATCTTGCGAGGCCGTTTCGAC-----GAGGCTACAACCTTTCATAAACAAGATT  
GAAATGCAGCTTCAGAACTTGTGCACTGGTCCAGCGCGGATGACAGCCAACAAGAAGCAATGA  
CCGCGATCTGAAGGACCAGCTACTACGCAAATTTGGTAGCCATATCAGTTCATTGAACTCGAGTT  
CTCTAAAAAGAAGAAGAAAGGGAAGCTACCAAGAGAAGCAAGACAAGCGTTGCTCGATTGGTGG  
ATGTTTCATAATAAATGGCCTTACCCTACTGAAGGCGACAAAATATCTCTGGCTGAAGAAACAGGTT  
TGGATCAAAAACAATCAACAATTGGTTTATAAACCAAAGGAAACGCCATTGGAAGCCTTCGGAG  
>AtKNAT3

GCGAGACACAAGGCGGAGATCCTTTTCGCATCCTCTTTACGAGCAGCTTTTGTTCGGCGCACGTTGC  
TTGTTTGAGAATCGCGACTCCGTTGATCAGCTTCCGAGAATCGATGCTCAGCTTGCTCAGTCTCA  
ACACGTCGTCGCTGGCGACGATAAAGAAGCTTGACCAGTTCATGACACATTATGTGTTGCTACTGTG  
TTCATTTAAAGAGCAATTGCAACAACATGTGCGTGTTCATGCAATGGAAGCTGTGATGGCTTGTG  
GGAGATTGAGCAGTCTCTTCAAAGCTTAAACAGGAGTGTCTCCTAGTGAGAGGTCGTTGATGGAAA  
GAGTTAGACAAGAAGCTTAAACATGAACTCAAACAGGGTTACAAGGAGAAGATAGTAGACATAAGAG  
AGGAGATATTAAGGAAGAGAAGAGCTGGGAAGTTACCAGGAGATACCACCTCTGTTCTCAAAGCT  
TGGTGGCAATCTCATTCCAATGGCCTTACCCTACTGAGGAAGATAAGGCCGAGGTTGGTGCAGA  
GACAGGTTTGCAGCTAAAACAGATAAACAATTGGTTCATCAATCAGAGAAAGAGGAACTGGCATAG  
CAATCCA

>AtKNAT4

GCGAGACACAAGGCGGAGATACTGTCTCATCCACTATACGAGCAACTTTTGTTCGGCACACGTGGC  
GTGCCTGAGGATCGCAACGCCGGTGGATCAGCTTCCGAGGATAGACGCACAGCTTGCTCAGTCT  
CAAACGTCGTGGCTGGCGATGACAAGGAGCTTGACCCTTCATGACGCATTATGTACTATTGCTT  
TGCTCTTTCAAAGAACAAGCTGCAACAGCATGTTTCGTGTTTCATGCAATGGAAGCTGTTATGGCCTGT  
TGGGAGATTGAACAGTCGCTTCAAAGTTTTACAGGAGTATCTCCTAGCGAGAGATCTTTGATGGAA  
CGAGTCAGACAAGAAGCTCAAACATGAACTCAAGCAGGGTTACAAGGAGAAAATTGTGGACATAAG  
AGAGGAGATACTGAGGAAGAGAAGAGCTGGAAAATTACCAGGAGACACCACCTCTGTTCTCAAAT  
CATGGTGGCAATCTCATTCTAAGTGGCCTTACCCTACTGAGGAAGATAAGGCCGAGGTTGGTGCAG  
GAGACGGGTTTGCAGCTCAAACAGATAAACAATTGGTTCATCAATCAAAGAAAGAGGAATTGGCAT  
AGCAATCCA

>AtKNAT5

GCTAGCTATAAGGCGGCGATTTTAAAGACATCCGATGTACGAGCAGCTTCTTTCGGCTCACGTGGC  
TTGCCTTAGGGTTGCGACTCCCGTTGACCAGATTCCGAGGATCGATGCTCAGCTCAGTCAGTTGC  
ATACCGTCGCCGCGTTGACAACAAGGAAGTTGATCATTTTCATGTACATTATGTTGTCTTGTGTTATG  
TTCATTTAAAGAACAAGCTCAAACACCACGTTTGTGTCCATGCAATGGAAGCCATTACGGCTTGTG  
GGAGATTGAACAATCACTGCAATCCCTAACTGGAGTTTCTCCAAGAGAGAGATCTTTGATGGAACG  
TGTGAAGAAAGAAGCTGAAGCATGAGCTTAAACAGGGTTTCAAAGAGAAGATTGTGGACATAAGAGA  
AGAGATAATGAGGAAGAGAAGGGCGGGAAAGTTGCCAGGAGATACGACTTCTGTACTCAAAGAAT  
GGTGGCGAACTCACTCGAAATGGCCATACCCAAGTGAAGGAAAGATAAGGCCAAAAGCTGGTTCAAGAA  
ACCGGTTTGCAGTTGAAACAGATCAACAATTGGTTCATCAACCAGAGGAAAAGAAAGCTGGAACAGC  
AACTCT

>AtKNAT6

ACTGTCATCAAAGCTAAAATCGCTTGTTCATCCTTCGTATCCTCGCTTACTTCAAGCTTACATCGATT  
GCCAAAAGGTTCGGAGCACCACCGGAGATAGCGTGTACTAGAGGAGATTCAACGGGAGAGTGA  
TGTTTATAAGCAAGGAGCTGATCCTGAGCTTGTGATGAATTTATGGAAACGTAAGCTGCGATATATTAGTG  
AAATACAAATCGGATCTAGCAAGACCGTTTTCGAC-----GAGGCAACGTGTTTCTTGAACAAGATT  
GAGATGCAGCTACGGAACCTATGTACTGGTGTGCGAGGCAGAGGATGGGAGACAAGATGTGAAG  
ACCGGGACCTCAAAGATAGGTTGCTACGCAAATTTGGAAGCCGTATTAGTACTTTAAAGCTTGTGAGT  
TCTCAAAGAAGAAGAAGAAAGGAAAGTTACCAAGAGAAGCAAGACAAGCTCTTCTTGATTGGTGG  
ATCTCCATTATAAGTGGCCTTACCCTACTGAAGGAGATAAGATAGCATTAGCTGATGCAACGGGGT  
TAGACCAAAAACAATCAACAATTGGTTTATAAACCAAAGGAAACGTCATTGGAAGCCATCAGAG

>AtKNAT7

AGACAGTTGAAAGGTGAGATAGCGACACATCCGATGTATGAGCAATTATTAGCCGCACACGTGGC  
GTGTTTAAAGAGTAGCTACTCCAATAGATCAACTTCCGATCATTGAAGCTCAGCTTTCTCAATCTCAT  
CATCTTCTCCGTATGATCGTACGAGCTCGATAATTTCTTGGCACAATATGTAATGGTGTGTTGTGTA  
GCTTCAAAGAACAGCTGCAACAGCACGTGAGGGTTCATGCCGTCGAAGCTGTTATGGCTTGCCGT  
GAAATTGAGAACAACCTTCACTTCTTACAGGAGCAACTTTATCGGAAAGATCCCTTATGGAAAGA  
GTCAGACAAGAAGCTCAAAGTGAAGTCAAACAGGGTTTTAAATCGAGAATCGAAGATGTAAGAGAA  
GAGATAATGAGGAAGAGAAGGGCTGGGAAATTGCCAGGAGACACAAGCTGCTTGAATAATTG

GTGGCAACAACATTGCAAATGGCCTTACCCTACGGAAGATGACAAGGCAAATTTGGTGGAGGAGA  
CAGGATTGCAGTTGAAGCAAATCAACAATTGGTTCATTAACCAACGCAAGAGGAATTGGCACACA  
ACTCT

>AtSTM

GCCTCTGTCAAGGCCAAGATCATGGCTCATCCTCACTACCACCGCCTCTTGGCCGCTTATGTCAAT  
TGTCAGAAGGTTGGAGCACCACCGGAGGTTGTGGCGAGGCTGGAGGAGGCATGCTCGTCTGCCG  
CAGCCGCAGCCGCAGGTGAAGATCCAGGGCTTGATCAATTCATGGAAGCTTACTGTGAAATGCTC  
GTTAAGTATGAGCAAGAGCTCTCCAAACCTTTCAAG-----GAAGCTATGGTCTTCCTTCAACGT  
GTCGAGTGTCAATTCAAATCCCTCTCTATCCTCACCTAATGAATTTGTAGATCCACAAGCTGAGG  
ATAGAGAGCTTAAAGGACAGCTCTTGCGCAAGTACAGTGGTTACTTAGGGAGCCTCAAGCAAGAG  
TTCATGAAGAAGAGGAAGAAAGGAAAGCTCCCTAAAGAAGCTCGTCAACAACCTGCTTGATTGGTG  
GAGCCGTCCTACAAATGGCCTTACCCTTCGGAGCAACAAAAGCTCGCCCTTGCGGAATCAACGG  
GGCTGGACCAGAAACAGATAAACAATTGGTTCATAAACCAGAGGAAACGGCATTGGAAGCCGTCG  
GAG

>CbrYLBK-2043616\_streptophytes

AATCGTCTGAAGGCGAGAATAGTATCGCATCCTTTGTATGATCAACTGCTGGACGCGCATGTTTCT  
TGCCTCAAGGTGGCAACGCCTCTGGACCAGCTGCCTCTACTGGAGGTCCAACCTGGAGCGAGCTG  
ACCTTGTGCGGGGGAAGGGAGGTCGGAGCTGGATCGCTTCATGGCCCAATTTGTGGTCCTGTT  
GCGCTCCTTCAAAGTCCAATTGGAGGACCACGTGAAGGTGCATGCAAGGGAGGCAGTGGTGGCG  
TGCTGGGAGCTTGAGCAGTCATTGGTGTCAATCACAGGAATGGAGCCGAACGAGCGCTCGATTAT  
GGAACGAATGAAAGAGGAACTCAAGATGGAACCTCAAGAATGGTTACCGGGACAAGATCTGCGACG  
TGCGCGACGAAATCATGCGCAAGCGACGGGCGGGGAAGCTTCCGGGAGATACCACGGCTGTTCT  
GAAGACGTGGTGAATGCACACTCTAAATGGCCATACCCGACGGAAGAGGAGAAAACAAACCTGG  
TGCATCAGACAGGTCTGGAACCTGAAGCAGATCAACAACCTGGTTCATCAATCAGCGCAAGCGCAAT  
TGGCACACGTACCT

>CrGSM1

ccgcagcgcctgacggcggtacagcagcagcagggcgctaccggctgtggtccgcggcacctggacgtgcgcaaggcgtgctgccccgctt  
cccgctggtgccccgagagcagggcagggcgagctgcagtcgctgccacctccggcaaccagggttgatgaggccatgggcgcttac  
gtgcggtgctggcgctgtacggtgacgagggcgggcgggcggtggcc-----gagtgcgagagcctgatggcggacttggacaaca  
gttgagctgggcaacctgccaccaccgctgctgtgtgctgctggtggggcgagggcgtgagcagctgctgagcattgcgccacgtacggc  
agccagctggtgaggtggctgccagcctggcgagcggcccaaggtgggcaagctgcccggcccgccacgcagctgctcaagggtggt  
gggacgacaactcgtgtggcctaccctcggaggaggacaagaagcagctgggtgaggcgggcgctgaacaacacgcagattaaca  
actggtcatcaaccagcgcaagaggcactggcacaagcattc

>CrKNOX1

GATGTCATTAGATCGAAGATTATGTCTCATCCAACATATCCTCGGCTAGTAATGGCATATGTGAATT  
GTCATAAGATTGGAGCTCCTCCGGAGGTCGCCACAAGCTTAGAGGAAATTAGCAAGAAGTACCAG  
AGCTTTCGATCGGGAGCGGACCCTGAGCTGGACAATTTTCATGGAAACATACTGTAACGTTCTACA  
GAAGTACCACGATGAGCTGATGCAGCCTTATAAA-----GAGGCGATGACCTTCTTCAGGAAGAT  
AGAAGTGCAGCTCAACGCGCTGAGCAAGGGCACCGTGGAGGAGATGATAGACCCACTTGCAGAT  
GATCAGAAGGTGAAGGAACAACCTCCTGCGTAAGTACAGTGGTTACATATAAACTTAAAGCAGGAG  
TTCTTAAAAAGAAGAAAAAGGAAAGTTGCCAAAGAATGCACGTGAGAAGCTGCTTGACTGGTGG  
AATCAGCATTACAAATGGCCATATCCATCTGAAGCAGAGAAAGCGGCCTTAGCCGAAACCACAGG  
ACTCGATCAGAAGCAGATAAATAATTGGTTTATAAACCAGCGGAAGCGGCACTGGAAACCATCGG  
AA

>CrKNOX2

GACCTGATCAGAACCAAGATTGTATCTCATCCATCTTACCCTCGGCTTGTGATGGCTTACGTGAAT  
TGCTACAAGATTGGAGCTCCAGAAGACGCGGCCTTGATTCTAGAAGAAGTATCAAGAAAATACCAG  
GAAATCAGATCGGGAGCGGACCCCGAGCTTGACAACCTTCATGGAATTATATTGCAATGTGCTACA  
GAGGTATCACGAAGAACTCACACATCCTTACAAG-----GAGGCAATGGCGTTCTTCAAGAAGAT  
AGAGCTGCAATTGGATGCTATCAGCAAGGGCAGCCTGGATGAGATGATTGACCCACTTGCAGAGG  
ACCAAAAGCTCAAAGAACAGCTGCTTCGAAAGTACAGTGGCTACATATTCAAACTCAAACAGGAAT  
TCCTTAAAAAGAAGAAAAAGGAAAGCTTCCAAGGGAAGCTCGGCAAATGTTGCTTGACTGGTGG  
ACCCAGCATTACAAATGGCCATATCCATCTGAGGCTGAAAAGACAGCTTTGGCAGAATCAACAGGA  
CTTGACCAAAGCAGATAAATAACTGGTTCATCAATCAGCGAAAACGGCACTGGAAGCCATCGGA  
G

>CrKNOX3

GCGCGGCTCAAAGCAGACATCACCATGCATCCGCTCTATGACCAACTGCTTGCTGCTCACGTAGC

CTGCCTCCGCATAGCCACACCTGTGGATCAACTTCCTCGTATCGACGCGCAGATCGCGCAGGCAT  
CGCAAATTGTAGCCGAGGAGAAAGACGAACTCGATCAATTCATGGCTCATTATGACTCTTGCTCT  
GCACATTCAAAGAGCAGCTTCAGCAACATGTGAAGGTTTCATGCAATGGAAGCAGTAATGGCATGC  
TGGGAGTTGGAGCAATCTTTGCTCACATTAACAGGTGTATCCCCTACAGAACGCACATTGATGGAA  
CGTGTCAAGCAGGAGCTGAAGAACGAGCTGAAAACGGCTACAAAGACAGGATTGTGGATGTCA  
GAGAAGAAATCTTAAGGAAACGTCGCGCCGGTAAGCTTCCTGGCGATACTACGTCTGTGCTCAA  
GCATGGTGGCATGCTCATTCAAATGGCCTTATCCAACGGAAGATGAAAAGGCGCGACTCGTTCA  
AGAGACTGGACTTCAATTGAAGCAAATAAATAATTGGTTCATCAACCAGCGGAAGCGTAATTGGCA  
TAGTAATCCA

>CspVAZE-2007516\_streptophytes

AATCGAATGAAGGCGAAGATCGTATCACACCCTCTGTACGAGCAGCTGCTGGATGCTCACGTATC  
CTGCCTCAAGGTGGCGACGCCTCTTGATCAGCTACCGCTTCTGGAGGTCCAGCTCGAAAGGGTG  
GACTTAGTCGCTGGAGACGAGAGGCTGGAGTTGGATCGCTTCATGGCACAATTTGTGGTCTCTCT  
GCGCTCCTTCAAGGCGCAATTGGAGGACCACGTGAAGGTTACGCGAGGGAGGCTGTGGTCCGCC  
TGCTGGGAGCTCGAGCAATCGCTGGTCTCCATCACAGGAATGGAGCCGAACGAGCGCTCGATCA  
TGGAGCGCATGAAGGAGGAGCTCAAGATGGAACCTCAAGAATGGCTACCGTGACAAGATTTGCGAT  
GTGAGGGACGAAATCATGCGCAAGCGGCGTGCGGGGAAGCTTCCCGGGGACACGACGGCTGTC  
CTGAAGACGTGGTGAATGCTCACTCTAAGTGGCCCTACCCACGGAGGAGGAAAAGACAAACCT  
GGTATGCAGACGGGCTTGGAGCTGAAGCAGATCAACAACCTGGTTCATCAACCAGCGCAAACGCA  
ACTGGCACACCTCGCCC

>DfoAWOI-2000571\_mosses

GCCAGAGAGAAGGCTTTGATTGTGGCTCATCCACTTTATCCAGATTTGCTGATGGCTCACGCTGC  
GTGTCTTCGAGTAGGAACCCCTGTGGATCAGCTGCCACAAATTGAAGCCCAATTGGCTCAGGCTC  
CTCATGTTACAGCAGAGGAGAAAGCCGAGCTTGACAATTTTCATGACTCAATATATCATGCTTCTGT  
GTAACCTTCAAAGAACTTTGCAGCAGCATGTTTACACTGATGTAACCTGAGGCAATGATGTCCTGCT  
GGGAGATAGAGCAGGCGCTTCACGGCCTCACTGGGGTCTCAGCGTCGGAGCGCACACTCATGGA  
ACGAGTGCGCCAAGAACTCAAATATGAGCTCAAGCAGGGTTATAGAGCAAGAATTGTTGACGTGC  
GAGAGGAAATCCTTCGCAAACGTCGTGCTGGGAAGTTACCGGAAGGCACAACAACGGTCTTGAAG  
GCATGGTGGCAAGCGCACTCAAAGTGGCCTTACCCGACGGAAGATGAGAAAGAACGCTTGATTCA  
AGAAACAGGGCTGGAGCTGAAGCAAGTGAACAACCTGGTTCATCAACCAGCGCAAGCGAAACTGG  
CACAGCAACCCT

>EdiCAPN-2003280\_ferns

AGAATATTGAAAGGTGAGATCCTGAAGCACCCCTCTGTGACCAGATCCTGGCGGCTCACATTGC  
CTGCCTCCGCATCGCCACACCTGTGACCACCTCCCTTCCATTGATGCTCAGTTGCTCAATACCCC  
ACATGTTATCGCCGACCACAGTGGCGAGCTCGATCAATTCATGACTCACTTTGCACCTTCTTCTTTG  
GTCTTTCAAAGAACATCTTCAACAACACATGCGGGTTCATGTGATGGAAGCTGTTATGGCCTGTTT  
TGAGCTAGAGCAATCCTTGCTAGCATTAAACAGGTGTTTCAGCGGCGGAGCGCTCCTTAATGGAAC  
GTGTAAGACAGGAGCTAAAAGTTACACTAAAGCAGGGATACAAAGACAGGATAGTCGATGTCAGG  
GAAGAAATTCTACGAAAGCGTAGAGCTGGCAAACCTCCGGGTAACACGACGACCGTTTTAAAGGA  
CTGGTGGGATGCGCACTCAAATGGCCATATCCTACTGAGGATGAAAAGGCCAGACTGGTTCAAG  
AAACGGGATTGCAATTGAAACAAATAAACAATTGGTTTATAAACCAAAGAAAGAGGAATTGGCATAA  
CAACCCT

>EdiCAPN-2006400\_ferns

GAAGCATTGAGAGCACAAATCATGTCACATCCACAGTACCCCCAGCTGGTTACAGCATATTTAAAC  
TGCCAGAAGGTTGGTGCTCCTCCTGAGATAGTTGTGGGGCTTGATGAGCTTAGTAGAGAATATCC  
AAATCACCTTTCTGGATCAGATCCGGACTTGGACCAGTTCATGGAGGATTATTGCAACTTGTGCA  
ACGATATCACGAGGAGCTAACAACGCCATTCAA-----GAAGCCATGTCCTTCTTTGAAAGAT  
AGAGTTGCAGCTTAACAGCCTAAGTAAAGGAAGCATCTTTCACGATGCTGACCCTCTTGCAGAAGA  
AGCAAACTGAAGGAGAACTTTTGCGCAAGTATAGTGGATATATCTCTGCACTGAAACATGAGTT  
TCTGAAAAAGAAGAAGGGGAAACTTCCAAAAGAGGCGAGGCAGAACTTCTAGACTGGTGGGA  
ATCAGCATTACAAGTGGCCATATCCCTCTGAGACAGAGAAAACGTGGCTGGCAGAGAGCACTGGG  
CTGGATCAGAAGCAAATAAACAACCTGGTTCATCAATCAGAGGAAGCGCCATTGGAAGCCGTCAGA  
G

>EdiCAPN-2010377\_ferns

GCCAGAATAAAAGCAGAGATCCTGGCTCACCCCTCTGCGAGCAGCTCCTCGCTGCGCATGTTGC  
CTGTCTCCGTATCGCCACACCTGTCAACCAGCTCCCTCTATCGACAACCAGCTTGCCAATTTCAA  
CCAGGTTGTTGCCGACGAAAAGGACGAACTCGATCAGTTCATGACTCATTACGTGCTGCTTCTCTG

GTCTTTTAAAGAACATCTTCAGCAGCACATGCAGGTGCATGTAATGGAAGCTGTTATGGCCTGCTG  
CGAGCTAGAGCAATCCTTGCTAGCCATAACAGGTGTTGCACCGACTGAGCGCTCTCTAATGGAGC  
GTGTTAGACAGGAGCTAAAAGTTCAACTAAAGAATGGATACAAGGACCGGATTGTTGATGTCAGG  
GAAGAAATTCTACGAAAGCGTAGAGCTGAAAGCTTCTGGCGACACTACAACAGTTTTGAAGGG  
CTGGTGGGATGCACACTCAAATGGCCATATCCTACTGAGGATGAAAAGTCCCGGCTGGTTCAAG  
AACAGGATTGCATTTGAAACAGATAAACAATTGGTTTATTAACCAAAGAAAGAGGAACTGGCACA  
GCAACCCT

>EdiCAPN-2039743\_ferns

GCGCGGATGAAGGCGGATATACTGGGGCACCCCTCTACGAGCAGCTGCTGTCTGCGCACGTGG  
GGTGCCTTCGCATTGCCACGCCTGTGCACCACCTCCCGCGCATCGATGCACAGCTTGCTGATGCA  
CAGCATGTTGTCGCCCAAGATAAAGACGAACTCGATCAATTCATGACTCATTATGTGTTGCTTCTCT  
GCTCTTTTAAAGAACATCTTCAACAACATGTGAGGGTACATGCGATGGAAGCGGTTATGGCCTGTT  
GGGAACTGGAGCAATCCTTGCTAGCTTTAACAGGGGTTGCGCCAACAGAGCGTTCATTAATGGAG  
CGTGTAAAGGCAGGAGCTAAAACTGAACTAAAGCAGGGATACAAGAAAGGATTGTTGATGTTAGA  
GAAGAAATTCTACGAAAGCGTAGAGCTGGCAAACCTTCTGGCGATAGCACTTCTGTTTTGAAGACT  
TGGTGGGATTTCGCACTCCAAATGGCCTTATCCCACTGAAGATGAAAAGGCTAGGCTGGTTCAGGA  
AACAGGGTTGCAGCTCAAACAAATCAACAACCTGGTTTATAAACCAAAGGAAGAGGAAATTGGCATAG  
CAACCC

>LdePQTO-2010278\_lycophytes

GTGAGATTGAAAGGAGAGATCGTGTCTCGCATCCTTTGTACAACCAGTTGGTGACTGCACATGTGCA  
GTGTTTGCGCACTGCCACACCAGTGGACCAGCTGCCAAAGATCGATGCCCGATTGGCTAATGCCG  
GCCACATAACAGCGGAAGACAGGGATGAGTTGAATGGGTTTCATGGCCAACTATGTTCTTCTTCTCC  
AATCTTTTAAAGGATCAATTGCAACGACATGTACGAGTCCATGCAATGGAAGCTGTTATTGCCTGTT  
GGAAGTTGGAGCAGTCCCTTTTGAATCTAACAGGGGCTACACCTACTGAGCGCACTCTCATGGAG  
CGAGTGCGCCATGAATTGAAGCTTGAATTGAAGCAGGGTTATAAGGCAAGGATCAATGATGTAAG  
GGAAGAAATTTTGCGCAAGCGTCTGTGCTGGCAAGTTGCCAGGCGATACAACATCAGTACTTAAAT  
CTTGGTGGTTTGCACACTCAAAGTGGCCGTATCCTTCGGAAGAAGAAAAGGCAAGGCTTGTCCAG  
GAGACTGGCTTAGAGTTGAAACAAATCAACAACCTGGTTTCATCAATCAACGAAAGAGAACTGGCAT  
ACAATGCA

>LdePQTO-2010435\_lycophytes

GATGAGATTGAGGCGGCGATTCTCTCTCATCCTCATTATTCGAGTCTCGTTGCAGCTCATATGAAT  
TGTCACAAGGTAGGAGCTTCCCCAGAAGTTGTATCCCATATCGATAGCCTCATCAGGAAATTCAG  
GAGAGGCAACCTGGTGTGATCCAGAGCTCGATCAGTTTATGTACACCTACTGCAATATGCTTCTG  
AACTATCAACGAGAGATCACCAGAACGTTTGAG-----GAAGCGATGGCTTGTGTCAGAAGCTA  
GAACTCAGCTGAATATCATCTCTACCGGAAGCATCGACTTAGAAATTGACCCTTTCGCAGAAGAG  
AAGGAGATAAAAGAACATCTTATGCGAAAGTACAGTGGCTACATTGGGAGCTTGAAGCAAGAGTTT  
TCGAGAAAGAAGAAGAAAGGGAAGCTTCCAAGAGAGTCCAGGCAACAGCTACTGAACTGGTGGTC  
TATGCATATTAATGGCCTTACCCCTCGGAGGTGGAGAAGGCAAGCCTAGCAGAGTCTACTGGAC  
TGGATCAAAAACAAATCAACAACCTGGTTTATAAATCAGAGGAAGAGGCACTGGAATCCTTCGGAT

>LdePQTO-2081329\_lycophytes

AGCGAAATCAGGGCTGCCATCCTTGACATCCTCACTATCCTCGGTTGGTTGCAGCCACATGAA  
CTGCCACAAGGTGGCAGCTTCTTCGGAAGTTGTTTCTCAGATTGACGATCTCATACGGGAATTCCA  
TGAGAGGCAGTTTGGAGCAAATCCAGAACTCGATCACTTCATGGTTTCTATTGCAACATGCTGAT  
GAGCTACGAGCAAGAGGTTAGCAGGACATAAAG-----GATGCGATGTCTTTCTGCAGGAAAT  
TGGAACAGCAGCTCAGTGTCTTCTCAACTGGAAGTATCGATTTGAAATTGATCCTTTAGCAGAAG  
AGAAAGAATTAAGGAACAACCTGATGCGCAGATACAGTGGGCGTATTGGTAGCTTAAAGCAGGAA  
TTTATGAAGAAAAAGAAAAAGGGAAAGCTTCCAAAAGAGTCCAGGCAACAACCTCCTAGACTGGTGG  
TCAGGGCATATAAATGGCCTTATCCCTCGGAGGAAGAGAAGGCCAGCTTAGCGGAATCTACAGG  
CTTGGGCCAGAAACAAATCAACAACCTGGTTTATAAACCAGAGGAAGAGGCACTGGAGGCCTGCGG  
AA

>LdePQTO-2081967\_lycophytes

GTGGGATTGAAAGCGGACATTGTGTCTCACCTCTCTATGAACAGCTTCTGGAAGCTCATGTGGC  
ATGCTTACGCATTGCAACTCCTGTGGATCATCTGGCAAAGATAGACGGCCAGCTTGTCCACTGTCA  
TCACATCACAGCCAACAACAAGGATGAGCTTGATCAATTTATGACACAATACCTATTATTGCTCCGG  
TCGTTTAAAGGAAAGGTTGCAACATCATGTGTGTGTGCATGCGAAAGAAGCTGTCATTGCTTGCCGA  
GAGCTCGAATATTCATTTTGAAGTTTAACTGGTGCATCCCCAACTGAGAGGACACTCATGGAGCGG  
GTTTCGACAAGAGCTTAAGCATGAACTTAAACAGGGATATAGAGATAGAATAGCGGATGTGAGAGA

GGAGATACTTCGGAAGCGCCGTGCTGGAAAATTACCTGGGGATACAACGTCTGTCCTAAAAGCCT  
GGTGGCAAGCTCATTCAAATGGCCTTATCCCACGGAAGATGAGAAGGCTCGGTTAGTGCAAGAG  
ACCGGCCTTGAAATGAAGCAAATCAACAATTGGTTCATAAATCAAAGGAAACGAAACTGGCATCAC  
CACCT

>LdePQTO-2083351\_lycophytes

GTAAGACGGAAAGCTGAAATTGTATCACATCCACTGTATGATCAATTATTGACGGCACATGTTGCA  
TGCTTGAGAACCGCAACACCAGTTGATCAACTATCGAAAATTGACGCACAATTGGCACATGCCAGC  
CATGTAGCGGCAGAAGATAAGGATGAGCTAAATCAGTTCATGGCTCAATATGTGATGCTTCTCCAC  
TCCTTCAAGGAGCAATTGCAACAACATGTGCGGGTTCATGCTATGGAGGCTGTTGTGCGCATGCTG  
GGAGATGGAGCAGTCACTTCTAAATTTGACAGGGGTGACCCCTACAGAGAGAACTCTTATGGAGC  
GAGTACGACATGAGCTGAAGCTTGAATTGAAACAAGGATATCGAGATCGGATCAATGATGTTAGG  
GAGGAGATCCTTCGAAAGCGTCTGCTGGCAAGTTACCTGGAGACACTACATCAGTACTCAAGGC  
CTGGTGGCATGCACACGCAAAGTGGCCTTACCCATCGGAAGATGAAAAAGCAAGGTTAGTGCAAG  
AGACTGGACTAGAAGTGAACAGATCAACAATTGGTTCATCAATCAGCGAAAGAGAAATTGGACCA  
ACAACCCA

>LspCHJJ-2136614\_liverworts

ATCAAACCTAAAGCGAAGGCCCTCACGCACCCGTTGTTTCCTCAGATGCTCGCCGCACATGTTGC  
CTGTTTGAGAGCCTGCACGCCGATCGACCAGCTTTCAACTATTGACGAGCATCTCAGTAATGCTCA  
AGCTGTGATAGATGCTGACATGGACGATCTGGACTTCTCCATCAGGACCTACACGATGATGGTGG  
TGTATCTTCATTTTCGAGTTACAGCATCATATACGTATGCATACTGCAGAAGCAATGCTGGGATGCT  
GGGACCTGGAGCAGAAGCTTCACAATCTAACCGGCGTCCCTCCGTCTGAGCGCTCTCTGATGGA  
GCGCGTTTCGTCGAGATCTGAAGGCCGAACTCGAGGAGGGCTATCGGAAAAAGATTATCGAGGTG  
AGGGAGGAGATTCTCCGCAAACGCCGAGCTGGAAGCTACCTGAAGGGACAACGTCAATCTTAA  
ATCCTGGTGAACGATCATGCAAAGTGGCCCTACCCCTACCGAGGACGAGAAGGAATATTTGATCC  
AAGAGACAGGGCTTGAATTGAAGCAGGTCAACAACCTGTTTCATTAATCAACGCAAGAGAACTGG  
CACAGCAACCCT

>AXG93\_606s1230

TTAGACCTTCAGTGTCTCATCGTGCATCATCCTGACCTCCCTAAGATAATTGTGGCAAGCCTTGCC  
TGCTATAAGATAAGGGCTGATGAAGAGGAGAAAAAGCAGCTGGACGAGGTGGCCAACTTATCTCT  
TTCCAAGCTCCCAGGTAAAGACCCACGTCTCGACTTATGCTTGGATAAGTATCTGAAAGCCCTCGA  
TGAGTTGGAGAAACACATTTTCGAAGCTGGTCACG-----TCAGCCGACACTCACTGTGTTTCAGAT  
GAAACAGAACATTCTTATACAGTGTCCAGAACTTGGTCCCCAGCGATCTCTCCCCATGTTGACAGA  
TCAAGAATGGAGAGGAGCAATCTTAGCTGCATATAATCCAAGTCTTCTCAGGTTGAAAACGAGGCA  
TCTGAAAGAAGGCCGCGAGAAACAAGCTGCCCGATCCGGCTCGACGTATTTTGTCAATTGGTGG  
CCGAACATCAGGGGAAGCCTTACCCGTCGGAGGAGGAGAAACAAATTCTGGCCAAGTGCTCGGG  
CCTTGAGATTGATCAGATCAATAACTGTTTCATCAATCAGAGGAAAAGACACTGCTGCTCTGCGTT  
C

>AXG93\_3769s1000

GCCAGATTCAGGGCTAGACTCATTACCCATCCATTATTTCTCAACTCCTCAAGGCACATGTAGAC  
TGCATCCGTGTGATGACTCCAGCATCCAAGATACGTGACATCAATCTGCAGCTGGTTCAGGCTCAA  
AAGTTTTTCGAACCTGATGATTTTGAATTCGACTACTTCTGGAAAATTTCTGGTTCGGATGAAAC  
ATTTCCAATCGAAATTGGAGATGCAGCTCAAGGTTACACCACTTTGGCTTACAGCAAATTATGGC  
GCATCGAGCGGGTACTCGTGCATGACAGGTCAGCGCATTCCAGATCGTGCTGTCATGGAGAG  
CATCAGGCGAGAGTTGATTGCATCACTTTTTGAAAAGTACAAGAAGAAGATCAAGAAGTGAGAGA  
TGAGATTTTGAGAAAACGAAGAGCGGGCAAATTGCCAGACGGAACCACACAAATACTCAAGGCGT  
GGTGGGATGCTCATTCAAAGTGGCCTTATCCAACGGAAGATGAGAAAGAAGTTCTTCTCAAACGA  
CGGGATTGGAAGTGAACAAATCAACAACCTGTTTCATAAATCAAAGGAAAAGAAATTGGCACAACA  
ATCCA

>Mpu\_69285

-----ATGCGCGTCCACACGATGTACCCCGCGCTTCTTCGCGCGTACTTCGCGTGCCGAAG  
CGCGGGCGCGGACCGCGCGACGGAGCTCGCGCTGCGGGCGGCGGAGAGACGCGCTCCTCGAAG  
ACGCGCGCCAGGGCGGCGAGGAGATGGACGACTTTCATCGCGCGATGCACCGCGGAGTTGAGAG  
CGTATTCCGTGGAGTTGAACGCCATCGCGCGG-----GAGAGCGAGGACGCGTGCGCGGAGTT  
TGAACGACGCGTCTGCTACGATCACCGCCTCCGCGGCGCGCTCTCTCACCCACGTGGACACGCGA  
GAGGACGACCTGCGCAAGTCTCTCAAGCGGAAGTACGCGACGTCGATATCGTCCCTTCGAGACG  
AGTTCCTCCGCAAGAGGAAGAAAGGCAAGTCCCGACGGACGCCACGGAGGCGCTGAAAAAATG  
GTGGAGCGACAACGTCGATGGCCGTATCCGTCCGAAGACGACAAGCGCGCGCTGTCAAAGTCT

ACCAACCTCAGCGCGACGCAGATCAACAACCTGGTTCATCAACCAGCGGAAGCGACACTGGCACAA  
GCTGTTT

>Msp.\_62285

GGCGCCATGCGCGCGGCGGTGCGCGCGAACCCGCGGTACCCGAAGCTCCTCGACGCGTACTTC  
GCGTGCCGCGGGTGGGCGCGGACGCGACGTCCAAGGCGTCGCTCGCCGACGCAGGCGACA  
GTTGCTGCGAGAAGCCACCCGGTACGGCGCCGAGCTCGACGAGTTCATGGACAACGTCACCGAC  
GAGCTCACCGCGTACGCCGAGGAGCTCGGCGCCTGTTTCGAC-----GAGGTGGACGCGGCGT  
GTCGAGAGGCGGAGGCTCGCGTGGCGGCGACGGCGGCTAAAAAATTGGCGAAGGAGTCCATCC  
CCGACACCCGCGAAGACGACCTGCGCAAGTCTCTGAAGCGCAAGTACGCCTCCTCCATCCTCGC  
GCTCAAGGATGAGTTTCTGAAGAAGACGAAGAAGGGAAAGCTGCCGTCTCCGCGACGAAAACGT  
TGAAGGAGTGGTGGCTGGCCAACCTGCTGTGGCCTTACCCGAGCGAAGACGCGAAAAGAGCGTT  
GATGAAACTCGCGGGCCTCAACCAGACGCAGATCAACAACCTGGTTCATCAACCAGCGGAAGCGG  
CACTGGCACAGGCTGTTC

>MspZRMT-2001684\_streptophytes

GTTGAAGCAAAAAATCTGTTCTCACACACCCGTTATATTCTGAGCTCATTAAAGACTTATTTTTGATT  
GCAAGAAGGTAATTACCCCATCAGAGCTAGAGGAGCTGAACAGCCTCATGCGTCGTTTGATTGAG  
CTCGCACCAACCAACCCAAGTCCAGAAATGGATTCTTCATGGAAGAATATGTGGGGCTTTTGAAG  
TTTTACTCAAACGAGCTTAGTAAGACGTACAAG-----GAAGCCTCAATTGTGTGCAATAATTTG  
AGGAGAAATTGAAGACCCTTTCGCTGTCTTACAAGCAGCGATGCAAACCCCAATACCGACGAG-  
--GCGCTGAAAGAAGAGCTGAAGAAAAGGTACGCGTCGTACCTGTGTTCCCTCAAACAAGACTACT  
TGAAGAAGAAGAAGAAAGGGAAGTTGCCAAGGGAGCAACGGAGACTCTTCTAGAGTGGTGGCA  
GGCTCATATCAAGTGGCCGTACCCAACAGAGGGCGGAAAAGTACAGCTGGCGGAGGGGCACAGGT  
TTGGATTCGAAACAAATCAACAATTGGTTCATTAATCAGCGGAAACGACACTGGTTCGCACGGTGAT

>Olu\_5313

GAGGAGATGACGCTCGCGGTGCGCGCTCATCCCATGTATCCGCGGCTTGTGGAAGCGTATTACG  
AGTGCCGGCAAATTGGCGCTGAGGGTGATGTGTTGGAAGCGCTCGATCGAGAGCGCGATGCGAT  
GTTGTAICTCGGTTACGGTACCGCAACGAGATTTGGACCGGTTTCATGCGAGAGTGCACGCACGAAC  
TTGAATCGTACGTCAAGGAGCTACACGCGCTATACGAA-----GACGCGAAGTCGTGCTGTCGA  
GAACTCGAGACGCGCGCGGAAAGTGCCTTCGGATGTGGTGTCTAACTCGCAACAGCGTCGCG  
ACCACGAGGAACGACTCAGAGAAGCCCTTAAACGTAAGTACGCGAGCAGTATTATGACGCTCAAG  
TCGGAGTTTCATGCGAAAACGAAAGAAAGGCAAGCTTCCAGACCAATCCACAGAGGTGCTAAAGAA  
CTGGTGGTCCGAAAACATCGTGTGGCCGTACCCGACTGAAGATGATAAGCGCGAACTCATCGCGC  
AAACAAAACCTCGACGCGACGCAGGTCAATAACTGGTTCATTAACTTTTCGAAAGCGCCACTGG-----  
----

>OsHOS58

GAGAGGGAGAAGGCGGCCGTGCGCGCGCACCCGCTCTACGAGCGCCTGCTCGAGGCGCACGTC  
GCCTGCCTCCGCGTCGCCACCCCGTGGACCAGCTCCCCCGCATCGACGCGCAGATCGCCGCG  
CGCCCGCCTCCCTCGCATCCGGTGGCGAGGAGCTCGACCTCTTCATGACACATTATGTGTTGCT  
TCTTTGCTCATTCAAGGAACAACCTCAGCAGCATGTGCGTGTTTCATGCAATGGAAGCAGTGATGGG  
GTGCTGGGAACTTGAACAGTCTTACAAAGTCTAACAGGGGCATCTCCTGGTGAAGATCCTTGGT  
TGAGCGTGTACGGCATGAGCTGAAGAACGAGCTTAAAGCAGGGGTACAAAGAAAAGCTTGTGGATA  
TTAGGGAAGAGATCCTTCGCAAGCGGAGAGCTGGTAAACTTCTGGTGAATACTGCATCTATACTAA  
AAGCTTGGTGGCAAGCTCATTCTAAGTGGCCATACCCAACCTGAAGACGACAAGGCCCGCCTGGTG  
CAGGAAACGGGGTTACAACCTGAAGCAAATCAACAATTGGTTCATTAACCAACGCAAACGAAACTGG  
CATAGCAACCCA

>OsHOS59

GAGCGGGAGAAGGCCGCCATCGCGGCGCACCCGCTGTACGAGCGGCTGCTGGAGGCGCACGTC  
GCGTGCTCCGCGTCGCCACCCCGTGGACCAGCTGCCCGCATCGACGCGCAGATTGCGGCG  
CGCCCCCGCGCTGGCCTCCGGCGGCGAGGAGCTCGACCTCTTCATGACCCATTATGTATTGC  
TCCTTTGTTGTTCAAGGAACAACCTACAGCAACATGTGCGTGTTTCATGCAATGGAAGCAGTAATGG  
CTTGCTGGGAACTTGAACAACTTTACAGAGCCTTACAGGGGCATCTCCTGGCGAGAGATCATT  
GTTGAGCGTGTACGGCAAGAGCTGAAACATGAGCTTAAACAGGGGTACAGAGAAAAGCTTGTGGA  
CATTAGGGAAGAGATACTCCGAAAGCGAAGAGCTGGAAAACCTCCAGGAGATAACAGCGTCTACTT  
TGAAAGCATGGTGGCAGGCTCACTCTAAATGGCCATACCCAACCTGAGGAGGACAAGGCTCGCTTG  
GTGCAGGAAACAGGGTTGCAACTAAAACAGATCAATAATTGGTTTATCAACCAACGTAAACGGAAC  
TGGCACAGCAATCCT

>OsHOS66

CAGCTGCTCAAGGGGGAGATCGCGGTGCACCCGCTGTGCGAGCAGCTGGTGGCGGCGCACGTG  
GGCTGCCTGCGCGTGGCGACGCCATCGACCACCTCCCGCTGATCGACGCGCAGCTCGCGCAG  
TCCAGCGGCCTCCTCCACCACGACAAGCAGGAGCTCGACTCCTTCCCTCGCGCAGTACATGATGCT  
GCTGTGCTCGTTCAGGGAGCAGCTGCAGCAGCACGTCCGGGTGCACGCCGTGGAGGCCGTCAT  
GGCGTGCCGCGAGATCGAGCAATCCTTGCAGGACCTAACCGGTGCAACTTTGTCCGAGCGATCC  
CTCATGGAGCGGGTCAGGCAAGAGCTCAAGATTGAGCTCAAGCAGGGCTTCAAGTCAAGGATTGA  
GGATGTGAGAGAAGAAATATTGAGGAAGAGGAGGGCAGGAAAGTTGCCTGGGGACACCACCACC  
ATACTCAAGCAATGGTGGCAGCAACACTCCAAGTGGCCATACCCACGAGGATGATAAGGCAAA  
GCTTGTGAAGAGACTGGCCTGCAGCTCAAGCAAATCAACAACCTGGTTCATCAATCAGAGAAAGC  
GTAAGTGGCACAACAACACTCA

>OsOSH1

GAGGCCATCAAGGCCAAGATCATCTCCACCCCACTACTCCTCCCTCCTCGCCGCCTACCTCGA  
CTGCCAGAAGGTTGGGGCGCCGCCGAGGTGGCGGCGAGGCTGACGGCGGTGGCGCAGGACC  
TGGAGCTTCGCCAGCGCGCCACGGAGCCGGAGCTGGACCAGTTCATGGAGGCGTACCACGAGAT  
GCTGGTGAAGTACAGGGAGGAGCTGACGAGGCCGCTGCAG-----GAGGCCATGGAGTTCTTG  
AGGAGGGTGGAGACGCAGCTCAACACGCTCTCCATCTCCGGCAGACTACCTGAGATTGATGCACA  
TGGTGTGGATCAGGAGCTCAAGCACCATTGCTGAAGAAGTACAGTGGATACCTGAGCTCCCTGA  
AGCAAGAAGTGTCAAAGAAGAAGAAAAAGGGAAAGCTCCCCAAGGATGCTCGTCAACAGCTCCTC  
AACTGGTGGGAGCTGCACTACAAATGGCCTTACCCCTCGGAGAGTCAGAAGGTGGCACTGGCGG  
AGTCGACGGGGCTGGACCTGAAGCAGATCAACAACCTGGTTCATCAACCAGAGGAAGCGGCACTG  
GAAGCCCTCCGAC

>OsOSH10

GATGCAATCAAAGCCAAGATCATGTGCGACCCCTCTACCCGGCTCTCCTCAGAGCCTTCATAGAT  
TGCCAGAAGGTCGGAGCTCCGCCGAGGTCGTGCGCCGGCTTTCCGCCCTCGCCGGCGAGCTC  
GACTCGCGTGCAGAATCGTCAGACCCGGAGCTCGACGAGTTTATGGAAACCTACATTGATATGCT  
GGTGAAGTACAGGCAGGAGCTGACAAGACCAATTCAA-----GAGGCCGACCAGTTCTTCAGAA  
ACATGGAGGCACAGATCGACTCGTTTACACTAGATGACAACCCGGAGATCACCAGCCCCTGCGCG  
GAGGACAAGGAGCTGAAGAGCCACCTCCTGAACAAGTACAGCGGCTACCTGAGCAGCCTATGGA  
GGGAGCTCTCCAAGAAGAAGAAGAAAGGCAAGCTGCCCGGGACGCTCGCCAGAAGCTCCTCCA  
CTGGTGGCAGCTTCACTACCGATGGCCCTACCCATCGGAGCTGGAGAAGGCGGCGCTGGCGGA  
GTCGACGGGGCTGGACGCGAAGCAGATCAACAACCTGGTTCATCAACCAGCGGAAGCGCCACTGG  
AAGCCGACGCCG

>OsOSH15

GAGTCCATCAAGGCCAAGATCATGGCGCACCCCAAGTACTCCGCCCTCCTCGCAGCCTACCTCGA  
CTGCCAGAAAGTCGGAGCGCCGCCGAGGTGCTGGAGAGGCTGACCGCCACGGCGGCAAAGCT  
GGACGCCCGCCCTCCCGCGCGCGACCCGGAGCTCGACCAGTTCATGGAGGCGTACTGCAACAT  
GCTGGCCAAGTACAGGGAGGAGCTGACGCGGCCGATCGAC-----GAGGCCATGGAGTTCTC  
AAGAGGGTGGAGTGCAGCTCGACACCATCGCCGGCGGGCGCCATCCGCCTGAGATCGACCCG  
CGCGCTGAGGATAAGGAGCTCAAGTTTTCAGCTTCTGAAGAAGTACAGTGGCTACTTGAGCAGCCT  
AAGGCAAGAATTTTCCAAGAAAAAGAAGAAAGGAAAGCTGCCTAAGGAGGCCAGGCAGAAGCTGC  
TTCAGTGGTGGGAGCTGCACTACAAGTGGCCTTACCCCTCAGAGACGGAGAAGATTGCGCTTGGC  
GAATCGACAGGACTAGATCAGAAGCAGATCAACAACCTGGTTCATCAACCAGAGGAAACGGCACTG  
GAAGCCATCGGAG

>OsOSH3

GACCCTGTCAAGGCCAGGATCGTCTCCACCCCTCGTACCACCGCCTCCTCGCCGCCTTCCTCGA  
CTGCCACAAGGTTGGCTGCCCGGCGGAGGCGGCCGAGGAGATCGCGGCGGCGGCGCGGGTGC  
GGGAGGCGCGGCAGCGGCCGAGGACCCGGAGCTCGACCAGTTCATGGAGGATTACTGCAAGC  
TGCTCGTGGAGTGTAAGGAGGAGCTCAGCCGGCCGCTCCAG-----GAGGCCGAGGAGTTCTC  
CAGGACGGTGGAGTCAGAGCTCAACTCCATCAATTCTGGGCCACCCCTCGGCATCATCGACCCTC  
GCTCCGACGACAAAGCGCTGAAGAGGCACCTGCTGAGGAAGTACAGCGGCTACCTGGGAGGCCCT  
GAGGAAGGAGCTGTGAAGAAGAGGAAGAAAGGAAAGCTCCCCAAGGAGGCGAGGCAGAAGCT  
GCTCACCTGGTGGGAGCTCCATTACCGGTGGCCGTACCCGTCGGAGATGGAGAAGATCGCCCTC  
GCCGAGTCGACGGGGCTGGAGCAGAAGCAGATCAACAACCTGGTTCATCAACCAGCGGAAGCGCC  
ACTGGAAGCCCACGGAG

>OsOSH45

gcgcggtgcaaggcggagatactggcgcacccgctgtacgagcagctgctgtcgcgcaagtgccgtgctccgcatgccaccccggtcga  
ccagctccccgcatcgacgcgagctcgcgagctcgagggcgctgctcgccgacgagcggccgagctcgaccagttcatgacgactac



gtcttgctattatgttcgtttaagagcagctacagcagcatgtccgtgttcgctatggaagcagtaatggcatgctgggaacttgaacaaaacct  
tcagagtttgacaggtgacctcgcccagcgagcgatccctaattggagcgtgtccgtcaagagctaaagcatgaactaaagcaggggtfacaaga  
gaagctgattgacataagagaagaaattcttcgcaagcgaagagcgggaaagctaccgggagacacgacttctacgttaaaagcttgggtggc  
agtctcatgcaaagtggccatatccaacagaggaagacaaggcacggctagtccaagaacagggtctacagctaaagcagatcaacaact  
ggttcatcaaccaaggaagaaaactggcacagtaacca

>OsOSH6

GAGCTCATGAAGGCTCAGATCGCCGGTCACCCGCGCTACCCGACCCTCCTCTCCGCCTACATCG  
AGTGTGCGCAAGGTGGGAGCGCCTCCGGAGGTGGCGTCGCTGCTGAAGGAGATCGGCCGGGAGA  
GGCGCGCCGGCGGGCGGGCGGTGCGACCCCGAGCTCGACGAGTTCATGGAGGCGTACTGCCGG  
GTGCTGGTGCCTACAAGGAGGAGCTGTCCCGGCCGTTCCGAC-----GAGGCGGGCTCTTTCC  
TCAGCAGCATCCAGACGCAGCTCAGCAACCTCTGCAGCGGCCACCGGGCAAGAGCAAAGCTC  
CCGCTTAGCTGACCACGAACTCAAGGAAATGCTTCTGAAGAAGTACAGTGGCTGCCTCAGCCGGC  
TCCGGTCCGAGTTCCTGAAGAAGCGGAAGAAAGGGAAGCTACCAAAGGACGCACGGTTCGGCACT  
GCTTGAATGGTGAACACACACTACCGCTGGCCATATCCACGGAAGAAGATAAGCTGAGGCTTG  
CAGCGAGGACAGGTCTTGACCCAAAGCAGATCAACAATTGTTTCATCAACCAGAGGAAGAGGCAC  
TGGAAGCCATCGGAC

>OsOSH71

gagctgatgaaggcgcagatcgccggccaccgagctacccttccctcctcctccgctacatcgaatgccgcaaggttggcgccgcccggag  
gtgaccacgctgctggaggagatcgccggggagggcgccggcgccggcgccctcgatccggagctcgacgagttcatggagacgtac  
tgccgggtgctggagcggtaacaaggaagaactcacacggccgttcgac-----gagcggcctccttccaccggcatccacaccag  
ctcgcctcctcctgtggcggcgccggggcaagaacacagctcccgttggctgacctgagctcaaagagatgttgcataagaagtacagt  
ggctgcctcagccgctccggtccgagttctgaagaagaggaagaaagggaaactaccgaaagacgcgcatcgccactatggactggg  
gaacacacattaccgttggccttaccacggaagagagataaggtgaggtggccgcatgactggcctcgacccgaagcagatcaacaact  
ggttcatcaaccagaggaagagggcactggaagccatcggag

>PcaRXRQ-2002267\_hornworts

GCAAAGAGGAAAGGAGACATTGTTTCTCATCCACTCTTCCCGAGCTCCTCTCAGCTCATGTGGCT  
TGTCTGCGCATCGCGACACCTGTTGACCAGCTCCCGACAATAGATGCACAATTGGCACAGTCACA  
CCTTGTCAATTTCTCCGAGAAGGAGGAGTTGGAGCATTACATGGCAGAGAGTGTGCTGCTTCTCC  
GGTCTTCAAAGATCAACTGCAGCAGCATGTTGAGTGCACGCCATGGAAGCTGTGATGGCTTGC  
TTCGACATTGAGAAGCAACTTGAAGATTTGACTGGCGTTTCGAGTTACAGAGCGCACACTTATGGAA  
CGCGTGCGGCAGGAGCTGAAATCTGAGCTCAAACAGGGTTACAGAGCCAAGATCATCGACGTGA  
GGGAGGAGATATTGCGCAAGCGCCGGGCCGAAAATTGCCAGGTGATACTACTACGGTGTGTA  
AACCTGGTGGCATGCGCATGCTAAGTGGCCCTATCCTACGGAGGACGAGAAGGCGCGGTTGGTC  
CAGGAAACGGGCCTGGAGCTGAAACAGATAAATAACTGGTTCATCAACCAACGCAAACGCAATTG  
GCATGCCAACCCC

>PcaRXRQ-2002409\_hornworts

GCAAAGAGAAAAGCGGATATTGTAGCGCATCCTCTGTTTCCCGAGCTTCTGTCTGCTCATGTGCGT  
TGCTTGCATCGCGACACCTGTGGACCAGCTGGGAACCATCGATGCACAGCTGTGCGAGTCAC  
ACCTTGTAATCAGCCAGACAAGGAGGAGCTGGAGCAATATATGGCAGACAACGTGCTGCTC  
CGTTCTTTCAAGGACCAGCTGCAGCAACACGTTTCGAGTACATGCCATGGAGGCTGTAATGTCTTG  
CTACGACCTGGAGAAGCAACTTGAAGAGCTGACTGGCGTTTCGGGCAACAGAGCGCACTCTCATG  
GAACGCGTGCGGCAGGAGCTTAAAGCAGAGCTCAAACAGGGATACAAAGCCAAGATCATAGATGT  
GAGGGAGGAGATACTGCGAAAGCGTGCAGCCGGCAAGCTGCCAGGTGATACTACTACGGTGTG  
AAAACATGGTGGCATGCGCATGCTAAGTGGCCCTACCCTACGGAAGACGAGAAGGCACGCCTAG  
TGCAGGAGACTGGTCTGGAGCTGAAGCAAATCAACAACCTGGTTCATCAACCAGCGCAAACGCAAC  
TGGCATGCTAATCCT

>PpMKN1

GCCAGAGACAAGTTTCTGATTGTTGCTCATCCACTATATCCAGATTTATTGAATGCACACGCTTCTT  
GTCTTCGGGTGGGGACCCCGGTAGATCAGCTTCCACATATTGAGGCGCAGTTAACTCAAGCTCGA  
CATGTTACAAGCGATGAAAAACAGAACCTTGATCAATTCATGGCCAGTATATCATGCTCCTTTGTT  
CGTTCAAAGATCACCTTCAACAACACGTATATTATGATGTTACTGAGGCCATGATGTCTTGTGGGA  
GTTGGAGCAAGCACTACACAATCTCACTGGAGTCTCTGCATCGGAGAGAAGTCTTATGGAACGTG  
TTCGCCAAGAAGTCAAGTACGAGCTGAAGCAGGGATACAGAGCAAGAATTGTTGATGTGCGAGAG  
GAGATCCTACGCAAACGGCGTGCTGGAAGCTGCCTGAGGGAAGTACAACAGTCTTGAAGGCTTG  
GTGGCAAGCACATTCAAAGTGGCCATATCCACGGAGGATGAAAAGGAGCGGCTGATTCAGGAG  
ACAGGTTTGAATTGAAGCAAGTGAATAATTGGTTCATAAACCAACGCAAGCGGAAGTGGCACAG  
CAATCCA

>PpMKN2

CTAGAGCTTCGGGCTGCTATCATCGACCACCCTTTCTATCCGGAGATGGTCCTAGCCCACGTTAG  
GGTCTTCAAGATTGGAGCACCCAGACGGTTACGCCGCAAACCTGGACGAACTAGCAAAGAAGTTTC  
AACGTTTTCCAAGATGGCTCTGATCCTGAGCTCGATCACTTCATGAGATCATACTGGGGCGTGCTTA  
CGAAGTTCGCGGAGGACTTGAAGAACCTTTCAAT-----AAGTTTATCCAGTTCACAGATAACA  
CCTCCAAGGCTCTGGAAGAAATCTGCGGCCACTACGTTAGCGTCATTGTTGACCCAATGGCATCG  
GACGAAGATATCAAGAAAGCCCTGAGGAAGAAATATGGTCGCCACATCGGAGAGCTCAAGGCTGA  
ATTCAACCGGGTGC GCAAGAAAGGGAAGTTGCCAACGAGTGCTCGCACCATCTTGAAGGACTGGT  
TCAATCGCCATTCACTGGCCTTACCCTTCAGAGATGGAGAAACAATACCTGCAAAGAATCTGCG  
GCTTGAATTTGAAGCAAATCAACAACCTGGTTCATTAATGAGCGCAAGAGGCACTGGAGCTGCGAA  
GGT

>PpMKN4

-----AGTTATCCAGACCATGAAATTTCTTTTGTG---TTTCACAGGATTGGTGC GC  
CGAAAGGTCTTCTTATCAAACCTAGACGAGATGGAGAAGAAGTTCCAACGATTCCAATACGGCCAG  
GATCCTTCACTTGATTTCTTCATGAGATCGTACATAGACTTGCTAACAAAATTTGAGAGGATTTGG  
AGAACCCTTACAAC-----AAATTCGCGCAGTATAAGGATAAGGTTACCAAGGATTTGGAAGATC  
TTTGC GGCCACTATATTAGCATAGTAATCGATCCTGACGCAGCGGACGAAGAACTCAAGAAAATGC  
TGAGGTTGAAATACGGG-----AAGCTGCCACCAATGCTCGTCAG  
ATCTTGAAGGACTGGTTTAGCCGTCATTCTTACTGGCCTTATCCTTCGGAATGGAAAAAGCATA  
CTGCAGCGACTCTGTGGCTTAAATTTGAAGCAAATCAACAACCTGGTTCATCAATGAGCGCAAGCGA  
CACTGGAGCTGCGAGGGT

>PpMKN5

CCAGAACTACGGGCTGCGATCATCGATCATCCTTTCTATCCAGAGATGGTTCTTGCCCATGTCAGA  
GTCTTTAAGATCGGTGCCCTAGACGTCTGATCAACAAATTAGATGACCTGACGAGGAAGTTTCAA  
CAGTACCAGAACGGCACCGACCCTGCACTCGATCACTTCATGAGGTCATACGTGGACATGCTCAC  
TAAATTCGCTGAGGACTTGGAGGAGCCTTTCAAC-----AAGTTCATGCAGTTC AAGGATAGCAC  
TACCAAAGCTCTGGAAGGCATCTGCGGCCACTACGTTAGTGTTGTTGTTGACCCTATGGCATCTGA  
CGAAGAGATCAAGAAAGCCCTGAGGAAGAAATATGGTCGCCACATCGGAGAGCTCAAAGCTGAGT  
TCAATCGTGTGCGCAAGAAAGGGAAGCTGCCTTCCAGTGCTCGCTCCATCTTGAAGGACTGGTTC  
AACCGCCATTCTTACTGGCCTTACCCTTCAGAGATGGAGAAACAGTACCTGCAAAAACCTCTGCGGT  
CTAAACCTAAAGCAAATTAACAACCTGGTTCATCAATGAGCGCAAGCGGCACTGGAGCTGCGAGGG  
T

>PpMKN6

ATTAGAAACCGAGCACTGATAGTAAATCATCCCTTGATCCAGAAATGCTCATGAATCATGCGGCT  
TGCCTTCGAGTTGGGACCCCTGTTGATCAACTTCCAAGCATTGAAGCCCAATTGGCTCAAGCACCT  
AATATCATTGAGGACGAGAAAGTGGAGCTTGACCGCTTCATGACCGAATATACAGCCCTACTGGG  
TGATTTCAAGGACGTATTGCAACATCATGTCTACACAGACGTAGCAGAAGCAATGATAGGATGCTG  
GGAGCTGGAACAAGCGCTTCATGCTCTCACTGGAGTATCTCCGACGGAGCGTAGTTTAATGGAGC  
GGGTGCGCCAGGAGCTCAAGCATGAACTCAAACAGGGCTACAGATCTAAAATAGAGGACGTTCTGT  
GAGGAAATTTGCGCAAACGGAGGGCTGGGAAGTTGCCTGAGGGCACTACAACCTGTCTCAAGG  
CGTGGTGGCAAGCACATTGCAAATGGCCCTACCCAACGGAGGATGAGAAAGAACAATTAATACAG  
GAGACAGGATTGGAGCTCAAGCAAGTCAACAACCTGGTTTATAAACCAGCGAAAGCGAAACTGGCA  
TAGCAACCCC

>PpuHPXA-2020612\_liverworts

AACCGGGCCAGGAGAGCGATTTCAGACGCATCCACTCTACCCATATCTCGTTTTCTGCCACATGGA  
CTGTTATAAAGTAGGCGCAGAAGCAGCAGATCTCCAAAACTGGAGGAGGTCAATTGGAAATATCA  
GCACCTTCAGCTAAATTCTCATTCCGAGTTGGACAGCGTGATGTCGTGGTACCTCGGCATTCTTCT  
CGACTTGAAAGGAAAGGTGGAGGAGCCATTTTG-----GCGGAGATGGAATGGTGCAAAGAAA  
TCTATGAAGAGGTGAAGCTTCTGGGTCCAGTAATTGCTGGTGTAAACAGTCGATCGCACAGCAGAC  
GAGTATGCTGTTAAGGAGTGGCTAAAATGGAGGCATGACCCTTGCATACGCAACTTGAGAGAGCA  
ATGCAGGAAGAAACGGAGGCAAGGGAACATTCCGAAACAGCTCGAGAACGTCTAGTGGAGTGG  
TTCAATGGTCATGGGGAATGGCCTTACCCTTCGGAGGACGAGAAGCTGCAGCTGGCGGAGCAGA  
CCAAGCTGGAGGGTCGGCAAATCAACAACCTGGTTCATAAACCAGCGGAAAAGGCATTGGGAGAAT  
TCTGCA

>SfalGUH-2020050\_mosses

GCCAGAGACAAAGCATTGATTGTGGCTCATCCACTATAACCCAGAGTTGCTGAATGCACACGCGTC  
TTGTCTTCGAGTGGGAACCCAGTGGATCAGCTCCACATATTGAGGCACAATTAGCTCAAGCTG

GATATGTCACAAACGATGAAAAAGTTGAACTTGATCAGTTCATGACTCAGTATATCATGCTTCTTTG  
CTCGTTTAAAGAACATCTACAACAACACGTCTACTCTGATGTTACTGAGGCAATGATGTCTTGCTG  
GGAGCTTGAGCAGGCCTTACATTCACACTACTGGGGTCTCTGCCTCAGAACGTACTCTCATGGAAC  
GAGTTCGCCAAGAACTCAAATACGAGCTGAAGCAGGGTTACAGAGCAAGAATCGTTGATGTACGA  
GAGGAGATTCTGCGCAAACGACGAGCTGGGAAGCTGCCTGAGGGTACAACAACAGTTTTTGAAGC  
TTGGTGGCAAGCACACGCTAAGTGGCCTTATCCAACGGAGGATGAGAAGGAGAAGCTGATACACG  
AGACTGGTCTGGAATTGAAGCAAGTGAATAACTGGTTCATTAATCAGCGTAAGCGGAACTGGCACA  
GCAATCCG

>SfalGUH-2165279\_mosses

GCCAGGAAGTGCTGTATGATTGTAATCATCCCCTCTATGAAGAAATGCTCGCAAATCACGCGGAT  
TGCCTCCGTGTTGGAACCTCAACAGATTTAATTTCAAATATCGAAGCCCAGATGTCTCAGGCCCCG  
ATAGTCATTGAGGACGAGCAATTGGATCTAGACCGCTGCATGACCGATTACACTATGGTCCTGGCT  
GCATTCAAGGATCTCTTGCAGCATCACGTGTTACAGACGTCACGGAGGCAATGATGTATGCTG  
GGAGTTGGAACAGGCTCTTTATGCTCTCACTGGAGCCACTCCAACAGAGCGAACTCTCATGGAGC  
GCGTGCGCCAGGAACTCAAGCATGAACTCAAGCAGGGCTATAAATCCAAAATTGAGGATGTTTGA  
GAGGAGATTTTGCGCAAACGGCGCGCTGGAAAACCTTCTGAGGGCACCACAACCTGTTCTCAAAGC  
TTGGTGGCACGCACATTCGAAGTGGCCTTACCCAACGGAGGATGAGAAAGAACTCTTAATACAGG  
AGACAGGATTGGAGCTGAAGCAAGTCAACAATTGGTTCATTAATCAAAGGAAGCGAAAC-----

-

>SkKNOX1

GAGATGCTTCGGGCTGCCATTGTGTCTCATCCCCACTACCCCGAACTCGTGGTTGCACATATGAA  
CTGTCACAAGGTGGCTGCGTCAACCAGAAGTCGTTTCCAGATTGACGAGATTATCCAGAACTTCAA  
GGACTTCCAGCCGGGGGCGAACC CGAACTCGACCAGTTCATGGTTGCATACTACTCGATGCTCC  
TGAAATGCGAGAAGGAAGTCAGGAAGACGTTCAAG-----GAAGCCGTGGCATTGTTGCAAGAAA  
CTGGACCAGCAGTTTTCAGGTCATCAACAACGGAAGTGCAGGAATCGAAGTTGATCCCATGGCCAA  
AGATAAAGAGCTCAAGGAGCAGCTCATGAGGAAGTACAGCGGATATATCAGCAGCCTCAAGCACG  
AGTTCCTGAAGAAGAAAAAGAAAGGTAAGCTTCCCAAGGACTCGAGGCAGATACTGCTCAACTGG  
TGGTCCGTTCACTACAAATGGCCGTATCCCTCGGAATCGGAGAAAGCAAGCTTGGCCGAATCGAC  
TGGACTCGACCAGAAGCAGATCAACAACCTGGTTTATCAACCAGAGGAAGCGCCACTGGAAGCCTT  
CGGAC

>SkKNOX2

AAAGAGATGAAGGCTGCAATCAGCGGCCATCCTCAGTACTTGGAGCTCATCAAAGCACATATGAG  
TATCAAGAAGGTTCGGAGCGTCGTCCAGAAAGGTGGCTGAAATAAACGAGGTCATTTCGTATGCACC  
AGGATTCACAACCAGGAGCAAATCCTGAACTGGACCAGTTTATGGTTGCGTATTGCGATGTTCTGA  
ACATGTACGAGAACCAACTGAACAAGGCATTCACA-----GGCGCAATTGAGTATTGCAAGCAGC  
AGGAGCAGGAGCTTAAGCTGGTTTCCGTTTCTGATGAAGGCGGCGACATTGACCCTCTCATTGGT  
GACAAGGAGATTAAGCGGGCGCTTATGAAGAAATACGGGGGTTATCTTGGTGGCTTAACGCAAGA  
GTACCTCAAAAAGAAGAAGAAGAGCAAGCTACCTTCTGCTGCGACAAGACACTTCGGGACTGGT  
GGTTTCAGCACCTGGAACATCCTTATCCCTCGGAAGCTCAGAAGGCAACTCTTGGCGCTACTACA  
AAGCTCGATCCTAAGCAAATCAACAACCTGGTTCATTAACCAAAGGAAGAGGCACTGGGATCCTTCT  
GCA

>SkKNOX3

GCTAAGCTCAAGGCCGACATAGTGACGCACCCTCTTTACGAGCAGTTGCTAGAGGCGCACGTTTC  
ATGTCTCCGATTGCTACTCCAGTGGACCAGCTGGGTAAGATCGATGGACAAATCGCACAGTGTC  
ATCAACTCATTGCAAACAGCAAGGACGAACTGGACCAATTTATGGCTCACTACGTTATGCTCCTGA  
GGTCTTTCAAGGACCAGCTGCAGCACCATGTCCGAGTTCATGCCAAAGAGGCCGTCATGGCTTGC  
TGGGAGCTGGAGCAGTCCCTGCTCGGACTAACCGGTGTATCACCCACGGAACGGACTCTCATGG  
AGCGAGTCCGGCAAGAGCTCAAGCACGAGCTGAAACACGGCTACAGAGCGAGGATTGTAGACGT  
TCGGGAKGAGATACTACGCAAACGTCGGGCTGGAAAGCTTCCGGGAGACACCACATCTGTGCTTA  
AAGCATGGTGGCATGCACATTCCAAATGGCCGTATCCGACGGAGGATGAAAAGGCACGCCTTGTT  
CAAGAGACGGGGTTGGAGCTGAAGCAGATCAACAACCTGGTTCATCAACCAACGGAAACGTAAC TG  
GCATCACCATCCA

>SpKNOX1

AATGCTATCAAAGCTGAAGTTGTTTCTCATCCTCTGTTTAAATCAGTACTCGAGGCTCATGTGGCGT  
GTCTTAAGGTTGCAACGCCTCTCGATCAAATCCCCTTGCTAGACCTCCAATTAGAAAAGAAAAATC  
TCGTGATTGAAGAAGAAACAACCGAGCTTAATTTTTTTATGACGCATTTTCGTGTGTTTACTTCAATC  
TTTCAAAGCCAACCTAGAGCAACATGTATTGATTCAAGCCAGAGAAGCAGTAATGTATGTTGGGA

ATTAGAACAATCCCTCATTTCGTTAACAGGTATGGAGCCTAACGAACGCAGCATTATGGAACGTAT  
GAGGACGGAACCTAAAAACAGTTAGATCAAGGCTATCGTACCAAATAGCAGACGTGCGTGAGG  
AAATTATGAGAAAAAGAAGGGCAGGAAAGTTGCCTAGCGATACGACCCAAATTTAAAGAGTTGGT  
GGAATGCCCACTCAAATGGCCGTATCCTACAGAAGACGAAAAGACTACTCTGGTTTCGGGAAACC  
GGTTTGAAGCTGAAGCAGATAAACAACCTGGTTTATAAACCCAGAGGAAAAGAACTGGCACAAACAAT  
AGC

>SpKNOX2

TGTGGGTATAAAGAGCAAATTATTTACACCCATTGTTTCCTGACCTCGTTTCAAATTCATCGAAT  
TACGCAAAGTAGGGGCACCTGAAGAAAAAATGAAAGAACTAGAAAATGAACGTGAAAGTCTTTTAA  
ATTTAATGAATGATCATGATGAAAATTTGGATTCTTTTATGAATGGTTTTTTGGTTCAATTGTCTGAA  
TCGAAAGTTGAAATTCAAAAATCTTTGAC-----GAGGCTACTAAATTTTGCTCAGATTTTGAGA  
AGAATATTTGCCAAAATTTGATGTCAAATAAATTTCAAGACGTAGATCCTACCGCTGAAGACAGGGA  
ATTGAAGGAGCAGCTGAAAAGAAAGTATAGAGCTTATTTGACGGGTTTAAAACAAGAATTCTTAA  
GAAGAGAAAGAAGGGGAAGCTTCCAAAAGAAGCCACCATGATTTTGCATAACTGGTGGTTTTCTCA  
CTTAAATTGGCCTTATCCGTTCGGACGCGGAGAAAACACAGCTAGCGGAAATGACCCGTCTTGACC  
CGAAGCAAATTAATAACTGGTTTATAAATCAACGGAAGCGACATTGGAACAACGCACCT

>SteHERT-2043328\_liverworts

TGCCGTTTCAAGGCTAGAGTGTGAGTCATCAGCTGTTTCCTCAACTGTTGAAAATACACATTGAT  
ATCATCCGCTTCATGACCCCATTC AACCTGCAGCGTGAGATTGACGTACAGCTCAAGAAGTCTCAG  
GTCGTCCACGACCCCGACGACAAAGCGTTTGTATGCTTTTCTGATGCTATACTGAAGGAGCTCAC  
CGACTATCGAGACCGTCTTGTGAAGGACCCAGAGGCGTCAACTACTCGTGCTTTTGTTCACATGT  
GGCATTTCGAGCGTGCAGTTTTTGAATGACTGGAATCCCTCCCTCAGAGCGCTCGCTGATGGAG  
CGCGTGAAAAAGAGCTCAAAGCGAGTCTCGAGGAAGGATATCGAGCGAAGATTTCAGAAGTAAG  
GGAGGAGATCATGCGAAAGCGCAGAGCAGGAAAACCTCCCGAAGGAACCACGACAACACTGAAA  
GCGTGGTGGGATGCACATGCGAAGTGGCCTTATCCTACGGAAGATGAGAAAGAAGTGCTGATCCA  
AAAGACAGGACTAGAGCTGAAGCAAGTCAACAACCTGGTTTCATCAACCAGCGCAAGAGGAACTGGC  
ATAATAACCCT
