# Supplementary material for: Nonreciprocal complementation of KNOX gene function in land plants
Source: PubMed Central journal article supplement (PMC5637896; doi:10.1111/nph.14318), 2016-11-25
Supplement: NPH-216-591-s008.pdf [file NPH-216-591-s008.pdf]

**Supporting Information Notes S6** Edited BELL alignment.

>AXG93\_855s1120  
-----IREIEALFREVLVSFSRSRGVTLHDRKKMFRAYIDEIDDWYIEYRSTLENINDETDDSFSGHFIGNIYT  
EYPLMELSRRLRRYRDTFLEHLVCVKKVLGDST-----RQQRMYSGRLSTWRPQRGLPDRASVLK  
AWLFTNFLHPYPKDVDKESLASATGLTRSQVSNWFINARVRVWKPMIEAMYLMDFP  
>AWOI-2011929  
HFSASRFLRSAQSILNEVCRVTQDNREDLELKKGKLGIMLDEVDAARYRRYCDHLQLLITGFNSQAGPNT  
ATPYTILALQAMSRHFRCLRDAIGAQLRVVKRALGEDDTSRLRYVDQQIRQQRALLGMLHAWRPQRGL  
PERAVSVLRAWLFEHFLHPYPKDVDKMSLAKQTGLTRSQVSNWFINARVRLWKPMVEEMYLEEQR  
>Aagrestis34670  
-----MMEELDNQYHRASSAYIEVDGTYRGYSEQMRVVITMDVALGKGAAQSYTNLAFE  
AMSRHFRGLRDTIEGQLRVCNRLGEEEDIPRLRFVDQQLRQQRALLGMLHAWRPQRGLPERAVTVLR  
AWLFEHFLHPYPKDGDKMSLARQTGLTRSQVSNWFINARVRLWKPMVEEMYLEESK  
>BEL1  
QIGSSKYLSPAQELLSEFCSLGVLEFMELQKRKAKLLSMLEELKRRYGHYREQMRVAAAAFEAAVGLG  
GAEIYTALASRAMSRHFRCLKDGLVGQIQATSQALGERETPRLRLLDQALRQKQSYMTLVHPWRPQR  
GLPERAVTTLRAWLFEHFLHPYPSDVKHILARQTGLSRSQVSNWFINARVRLWKPMIEEMYCEETR  
>BEL10/BLH10  
SVLRSRYLKPAQNLLDEVVSVKKIREEELQNKKNKLLTMVDEVVKRYNQYYHQMEALASSFEIVAGLGS  
AKPYTSVALNRISRHFALRDAIKEQIQIVREKLGEKGIPLRYLDQRLRQQRALLGMVPAWRPQRGLP  
ENSVSVLRAWLFEHFLHPYPKESEKIMLAKQTGLSKNQVANWFINARVRLWKPMIEEMYKEEFG  
>BLH1/EDA29  
NLVSSKYLKAAQELLDEVVNADSAERQEIQMKKAKLSNMLHEVEQRYRQYHQMQMVVSSFEQAAGI  
GSAKSYTSLAKTISRQFRCLKEAIAQIKAANKSLGEEDGSRLKFVDHHLRQQRALLGMINAWRPQRG  
LPERAVSVLRAWLFEHFLHPYPKDSKDHMLAKQTGLTRSQVSNWFINARVRLWKPMVEEMYMEEMK  
>BLH2/SAW1  
ILRNSRYTTAAQELLEEFCSVGRSDRIEHQRRKVKLLTMLEEVDRRYNHYCEQMVMVNSFDIVMGHG  
AALPYTALAQAAMSRHFRCLKDAVAQAQLKQSCCELLGDKDTPRLRLLLEQSLRQNRAFMGMMEAWRPQ  
RGLPERSVNILRAWLFEHFLHPYPSDADKHLLARQTGLSRNQVSNWFINARVRLWKPMVEEMYQQES  
K  
>BLH3  
SVLRSRYLKPTQQLLDEVVSVRKSERQELQSKSKLLTMVDEVVKRYNQYHHQMEALASSFEMVTGL  
GAAKPYTSVALNRISRHFCLRDAIKEQIQVIRGKLGEREIPRLRYLDQRLRQQRALLGMVPAWRPQRG  
LPENSVSILRAWLFEHFLHPYPKESEKIMLSKQTGLSKNQVANWFINARVRLWKPMIEEMYKEEFG  
>BLH4/SAW2  
TLRNSKYTKPAQELLEEFCSVGRADRIEHQRRKVKLLSMLEEVDRRYNHYCEQMVMVNSFDQVMGY  
GAAVPYTTLAQAAMSRHFRCLKDAVAVQLKRSCCELLGDKETPRLRLLLEQSLRQQRAFMGMMEAWRP  
QRGLPERSVNILRAWLFEHFLNPYPSDADKHLLARQTGLSRNQVSNWFINARVRLWKPMVEEMYQQE  
AK  
>BLH5  
RALAPIYLKAAQELLNEIVNVGNPGVAALQMKKAKLISM---VEQRYKQYHDQMQTISSFEQAAGLGSAN  
SYTHMALQTISKQFRAVKDMISLQIKQINKLLGQKE-----FDEQLKK----LGKMNAWRPQRGLPEKAVSVL  
RSWLFEHFLHPYPRDLDKVMLAKQTGLTKSQVSNWFINARVRMWKPLVEELYSEEMD  
>BLH6  
TIPNSKYLKAAQQLLDEAVNVKKSERQEMQSKLTKLLSMLDEVDRRYKQYYQQMQIVVSSFDVIAGYG  
AAKPYTALALQTISRHFRLRDAISGQILVLRKCLGEQQISRLKYVDQHLRQQR---GFMQAWRPQRGLP  
ENSVLILRAWLFEHFLHPYPKDSKIMLARQTGLSRGQVSNWFINARVRLWKPMVEEIIYKEEFT  
>BLH7  
TIHNSKYLKAAQELLDETENVVKAERQELQSKLSKLLSILDEVDRNYKQYYHQMQIVVSSFDVIAGCGAA  
KPYTALALQTISRHFRLRDAISGQILVIRKSLGGEQISRLRNVDQQRQQRALLGVMHTWRPQRGLPD  
SSVLVLRRAWLFEHFLHPYPKDSKIMLARQTGLSRGQVSNWFINARVRLWKPMVEEMYKEEFT  
>BLH8/PNF  
ILKSSRFLEPAQKMLEEFCISYA-----LKKAKLLFLQEEVCKWYKLYNHQLQTMSSFNVTAGLNTATPY  
ISLALKRTRSRSFKALRTAIAEHVKQIS-----KRQRSLVGFHEIWRPQRGLPERAVAVLRAWLFD  
HFLHPYPTSDSKQMLATQTGLSRNQVSNWFINARVRLWKPMVEEIHTELETK  
>BLH9/BLR/PNY/RPL/VAN  
ILKGSRFLKPAQMLLDEFNCVGR-----KKKSKLISMLDEVYKRYKQYYEQLQAVMGSFECVAGLGHAA

PYANLALKALSKEFKCLKNAITDQLQ-----HGFPVWRPHRGLPERAVTVLRAWLFDHF  
LHPYPTDIDLMLAKQTGLSRNQVSNWFINARVRVWKPMVEEIHMLETR  
>CAPN-2001274  
-----SERQDLQMKKTKLMAMLEEVDRRYRQYYFQMOMVSSFESAAGVGS AKTYTSLAL  
KTISRHFRCRLRNAIGGQVQAACKSLGEAD-----GMMHVWRPQRGLPERSVSILRAWLFEHFL  
HPYPKDVKVLLAKQTGLSRNQVSNWFINARVRLWKPMVEEMYTEEMK  
>CAPN-2002967  
-----SERQELQMKKAKLMAMLDEVDRRYRQXYFQMOMVSSLSAAGIGSAKTYTSLALK  
TISRHFRCRLDAICSQIRAACDSLGETE-----LGILHVWRPQRGLPERSVSILRAWLFEHFLHPY  
PKDGDVMLARQTGLSRNQVSNWFINARVRLWKPMVEEMYTEEMK  
>CAPN-2007100  
LMRNSKYLKPVQHLLDEFNVRVEERSQLQMKKTRLISMVEEVDRRYRQYRDQMOMVSSLSAAGIGSAKTYTSLALK  
GGAAPYTTLARQTMSRHFCLRDAISNEIRAICGTLGEEPTPRLRILDQQLRHQRSLMGMLQPWRPQR  
GLPERAVSVLRAWLFEHFLHPYPKDSEKLMLARQTGLTRNQVSNWFINARVRLWKPMVEEMYVEEQK  
>CAPN-2007101  
-----EERSQLQMKKTRLISMVEEVDRRYRQYRDQMOMVSSLSAAGIGSAKTYTSLALK  
TMSRHFCLRDAISNEIRAICGTLGEEPTPRLRILDQQLRHQRSLMGMLQPWRPQRGLPERAVSVLRA  
WLFHFLHPYPKDSEKLMLARQTGLTRNQVSNWFINARVRLWKPMVEEMYVEEQK  
>CrBELL1.Transcript\_12985  
YLNSKYLRVAQLLLEEVNIGCQENQELQLKKAKLVAMLDEVDRRYKLYFSQMEAVVNTFESAAGLG  
AAKTYTALALQTISKHFRGLRDAIGSQIRAASRALGQEDFGRLRYVDQQLCQPRTFLGMMHAWRPQR  
GLPERSVSVLRAWLFDHFLHPYPKDADKHMLAEQTGLTRNQVSNWFINARVRLWKPMVEEMYLEELK  
>CrBELL2.Transcript\_22605  
DLWTSKYLRPAQQLLDEVVSVVKTDRKEWQIKKAKLLAMVDEVDRRYRQYRDQMOMVSSLSAAGIGSAKTYTSLALK  
AAKAYTALASQTISKHFRCLKDAMKVQLQAVCKTLGEEVRSGLLDVDKELYQHALLGIIHPWRPQRGL  
PERSVSVLRAWLFEHFLHPYPKDSDKVRRLARQTGLTRNQVSNWFINARVRLWKPMVEEMYTEVKN  
>CrBELL3.Transcript\_69280  
ILNSKYLRPAQQLLNEFCNVCKDERCHLQLRKARLIAMVEELDRRYQYRDQMOMVSSLSAAGIGSAKTYTSLALK  
AAPYTTLAKRAMSRQFRSLRDAIGEHIKAVCRTLGEEVTPRLRLIDQQLRHQRSLISMLQAWRPQRGLP  
ERSVSVLRAWLFEHFLHPYPKDSEKAMLARLTGLSRNQVSNWFINARVRLWKPMVEEMYLEESK  
>CrBELL4.Transcript\_82348  
GSYGSKYLRPAQELLNEVVNVGQADRQELQAKRAKLVGMRDEVDRRYKQYYHQMQAVATSFESVAG  
LGAAAAYTALALQTISKHFRCLRDAITGQIQATCKALGEEETSRLRFIDQQLRQQRALLGMMQAWRPQ  
RGLPEHSVSILRAWLFEHFLHPYPKDADKIMLAKQTGLNRNQVSNWFINARVRLWKPMVEEMYLEETK  
>LOC\_Os01g62920.1  
VLGRSRFLGPAEKLFEIEICDVGGISGAEQQWKKTKLISMVEEVCKRYRQYYQQVAVMASFETVAGF  
SNAAPFAALALRAMAKHFKCLKSMILNQLRNTSDGLNKEI-----FGQPNIWRPQRGLPERAVSV  
LRAWLFEHFLHPYPTDGDQKMLAKQTGLTRNQVSNWFINARVRLWKPMVEEIHMLEMR  
>LOC\_Os03g03260.1  
HLRSSRFLPTQQLQEFCSLPVMEALELQRLKDKLYIMLEEVDRRYRRYCEQMRVAVAGGFEAVAGER  
AAGAYTAVAARTISRHFRLRDLGIVAQLQAARKALGEKDTPLRLVIDQCIRHHKSLVAAMHPWRPQRG  
LPDRAVTILRAWLFEHFLHPYPSDVKHILARQTGLSRNQVSNWFINARVRLWKPMVEEMYVEEMK  
>LOC\_Os03g06930.1  
YVQNSRFLRAARELLDEVVNVDRSERQDLQNKVTALMAMLQVDRRYRHYHHQMQIVMSSFDVAVAG  
GGAARPYTALALQTISRHFRLRDAIGAQAQAARRGLGEQDLSRLRYIDQQLRQQRAMFGMMHAWRP  
QRGLPESAVSVLRAWLFEHFLHPYPKDSEKLMLARQTGLSRGQVSNWFINARVRLWKPMIEEMYKEE  
FG  
>LOC\_Os03g47740.1  
AIRNSKYLRKAAQELLDEVVSVWKAQELQNKMAKLMAMLDEVDRKYKHYYHQMQIVVSSFDVAVAGS  
GAAKPYTAVLALQTISKHFRCLKDAINDQINVIRKLGEEELTRLRYIDQQLRQQRAFYGLLNARWRPQRG  
LPENSVSILRAWLFEHFLHPYPKDSEKLMLARQTGLTRSQISNWFNARVRLWKPMIEDMYKEEIG  
>LOC\_Os03g52239.1  
VLRNSKYTRAQELLEFCVGRADRFEHQKAKLISMLDEVDRRYNHYCDQMOMVSNFFDSVMGF  
GAATPYTALAQAAMSRHFRCCLKDAIAAQLRGTCEALGEKDTPLRLAIDQSLRQQRAMFGIMEAWRPQ  
RGLPERSVNILRSWLFHFLHPYPSDADKHLLARQTGLSRNQVSNWFINARVRLWKPMIEEMYQQEC  
K  
>LOC\_Os05g38120.1  
VLGRSRFLGPAQKLEIEICDVGVSAGAEQQWRKTRLISLMEDVCKRYRQYYQQLQAVVSSFETVAGL

SNAAPFASMLRTMSKHFYKLGKILNQLRNTGDGLGKED-----FSQPNIWRPQRGLPERAVSV  
LRAWLFEHFLHPYPTSDKQMLAKQTGLTRNQVSNWFINARVRLWKPMVEEIHNLNEMR  
>LOC\_Os06g01934.1  
QLRGSKYLGPVKALLAEFCSLDVMDDLLEERRKARILSMVEEVDRRYRRYREQMRAVEVSFEAVAGG  
GAAQVYTKLAMRAMSRHFRCLRDALVGQVRALRNAMGESQTPRLRVLDQCLRQQRAFSGAVFPWRP  
QRGLPERAVAVLRAWLFEHFLHPYPNDVDKHILARQTGLSRSQVSNWFINARVRLWKPMIEDMYKEET  
K  
>LOC\_Os10g39030.1  
HLRGSRFLLPTQQLLQEFCSLPVMDAAELQRLKGLYTMLEEVDRRYRRYCEQMRALAASFEAVAGE  
RAAASYTRLASRTISRHFRSLRDGVVAQLQAVRKQLGEKDTPLRVLDQCLRQHKAYAGMLHPWRPQ  
RGLPERAVSILRAWLFEHFLHPYPSDVKHILARQTGLSRSQVANWFINARVRLWKPMVEEMYAEEMK  
>LOC\_Os11g06020.1  
MVMSSKYLKAAQELLDEVVSVSKAERQELQMKKGKLNMLDEVEQRYRQYHQMQVVASFEAVAG  
GGSARTYTALALRTISRQFRCLRDAIAGQVRAASRALGEAVGSRLRYIDHQLRQQRALLGMMSAWRP  
QRGLPERSVSILRAWLFEHFLHPYPKDSDKIMLAKQTGLTRSQVSNWFINARVRLWKPMVEEMYLEET  
K  
>LOC\_Os12g43950.1  
AIRNSRYLKAAQELLDEVVSVWKAQELQNKMAKLMAMLDEVDRKYKHYYHQMOTVSSFDVAVAGP  
GSAKPYTAVLQITSRHFRCLKDAINDQINVIRKKLGEELTRLRYIDQQLRQQRAFYGMINAWRPQRG  
LPENSVTILRAWLFEHFLHPYPKDSEKMLLARQTGLTRSQISNWFINARVRLWKPMIEDMYKEEIG  
>MA\_10435446g0010  
VLKSSKYLKPAQQLLDEFNCVGRGDRFEIQRRRAKLLSMLEEVHRRYGGYCEQMCMVTSFESIAGLG  
AATPYTALALKAMSRHFKCLRDAINNQLRVTSKALGEDSTPLRFIDQNIQQRAVLGMLHAWRPQRG  
LPERSVSVLRAWLFEHFLHPYPTDADKHMLARQTGLSRSQVSNWFINARVRLWKPMVEEMYLQESK  
>MA\_111188g0010  
VLTGSKYLKAAQQLLDEVVNVGKAERQELQMKKAKLVAMLDEVDRYRQYHHQMIVVSSFEATAGF  
GAAKTYTSLALQITSRHFRCLRDAISGQIRMTSKSLGEEDTSRLRFVDQQLRQQRALLGMIHAWRPQR  
GLPERSVSVLRAWLFEHFLHPYPKDADKHMLARQTGLTRNQVSNWFINARVRLWKPMVEEMYNEETK  
>MA\_18002g0010  
SLTGSKYFCAAQQLLDEVVNVGKADRQELQMKKAKLVAMLDEVDRRYRQYHHQMHIVVSSFEAAAGF  
GAAKTYTSLALKTISRHFRSLRDAIAGQIRLTSKNLGEEDTSRLHFVDQQLRQQRALLGMIHAWRPQRG  
LPERAVSILRAWLFEHFLHPYPKDADKHLLARQTGLTRSQVSNWFINARVRLWKPMVEEMYMEELR  
>MA\_28447g0010  
LLENPKYMKVTQELFDELSNVGLGDLLALQKRKKELLWLLDEVQRQYRQYCDHREMVISSFESIAGVG  
AATPYLAPASKAMSRHFRCLKDAIKDQVKATCELLGEKETPLRFLEQSLRQQRAFVGMIEAWRPQKG  
LPQHSISVLRRAWLFEHFLNPYPSDADKHMLARKTGLTRNQVSNWFINARVRLWKPMIEDMYQEELK  
>MA\_6763g0010  
SLKNSRYLKAAQEILYFCNVGREDRFELQRRKAKLVSMLEEVDRRYRNYCDQMHLVSSFESVSTLG  
AAPYTALALKAMSRHFRCLKDAITGQLQVTIKALGEKGTPLRGFLERSIRQQR AFLGLMHPWRPQRG  
LPERSVSVLRAWLFEHFLHPYPTDADKHILAKQTGLTRSQVSNWFINARVRLWKPMVEEMYMEEIK  
>MA\_76835g0010  
-----MQIVVSSFETVTGFGTAKTYTSLALGTISRHFRCLRDAIVGQIC  
VSSKSLGEEDTSRLRFVDQQLRQQRALLGMIPAWRPQRGLPERAVSVLRAWLFEHFLHPYPKDADKH  
MLARQAGLTRSQVSNWFINARVRLWKPMVEEIIYMEEMK  
>PQTO-2005856  
FLSRSKYLKAAQQLLDEVCSVRMEERKDCETKKGKLLAMLQEVDRRYRIYSDQMHAVVASFDIVVGVG  
AATPYTALALQAMSRYFRCLRDAISSQIQICKALGEEIISRLRYVDQQLRQQR SFLGMLHAWRPQRGL  
PERSVSVLRAWLFEHFLHPYPKDADKIMLARQTGLTRSQVSNWFINARVRLWKPMVEEMYQEEAR  
>PQTO-2013388  
TLSSSKYLKVAHRLLEDEVCSVLGEERQTSQIRKTKLLSMLQEVDRQYRQYYDNMQALIFSFD SFGIGA  
ARPYTRMAVKAMSRHFRSLRDTIRNQIQITCKSLGEEYTTRLRFVDQQLRQQRALLGMLPAWRPQRGL  
PEQSVSVLRAWLFEHFLHPYPKDADKIMLAKQTGLSRSQVSNWFINARVRLWKPMVEEMYTDENR  
>PQTO-2013389  
TLSSSKYLKVAHRLLEDEVCSVLGEERQTSQIRKTKLLSMLQEVDRQYRQYYDHMQAVIFSFD SAVGVG  
AARPYTRLALKAMSRHFRCLRDTISNQIQITCKALGEEDTSRLRFVDQQIRQQRALLGMLPAWRPQRG  
LPEHSVSILRAWLFEHFLHPYPKDADKMMLARQTGLSRSQVSNWFINARVRLWKPMVEEMYLEENR  
>PQTO-2013390  
MLSSSRYL RVVQHLLDEVCSV-GEERQQYQIRKTQLLSMLQEVDRQYRQYYDHMQAVIFSFD SAVGV

GAARPYTRLALKAMSRHFRCLRDTISNQIQITCKALGEEDTSRLRFVDQQIRQQRALLGMLPAWRPQR  
GLPEHSVLSILRAWLFEHFLHPYPKDADKMMLARQTGLSRSQVSNWFINARVRLWKPMVEEMYLEENR  
>PpBELL1  
HISASKFLRSAQAILNEVCRVTPESRDDLELKKQKLSLMLDEVEARYRRYCDHLQLVITGFNSQAGPNT  
ATPYTILALQAMSRHFRCLKDAIGSQLRIVKRTLGEDDTSRLRYVDQQIRQQRALLGMLHAWRPQRGL  
PERAVSVLRAWLFEHFLHPYPKDVKLSLAKQTGLTRSQVSNWFINARVRLWKPMVEEMYVEEQK  
>PpBELL2  
HISASKFERSAQAILNEVCSVTPENRVDLELKKQKLNLMMLDEVETRYRRYCEHLQLVITGFNSQAGPST  
ATPYTILALQAMSRHFRCLKDAIGSQLKIVKRSFGEDETSRIRYVDQQIRQQRTLLGMLHAWRPQRGLP  
ERAVSVLRAWLFEHFLHPYPKDVKMSLAKQTGLTRSQVSNWFINARVRLWKPMVEEMYVEEQK  
>RXRQ-2024990  
-----YARAGRELLHEICSPCTEQRSQIEAKKARLTGMMEEVDGTYRGYSEQMRVVITTM DVALGKGA  
QSYTNLAFEAMSRHFRGLRDTIEGQLRVCNRLGEE DIPRLRFVDQQLRQQRALLGMLHAWRPQRGL  
PERAVTVLRAWLFEHFLHPYPKDGDKMSLARQTGLTRSQVSNWFINARVRLWKPMVEEMYLEESK  
>RXRQ-2142126  
-----YAKSGQDLLLEICSPAGDQKAQVEARKTRLISMIGDVGQYRTYIDHMKVVMVTIDTVMGKSSSLP  
YTKLALNAMSRRHFRALRDAIEGQLRVCNRLGEPNLPRLKYLDAQLRQQKAMLGMLHAWRPQRGLPE  
KAVILLRAWLFEHFLHPYPKDSKITLAKKTGLTRSQVSNWFINARVRLWKPMVEEMYMEESR  
>SkBEL1  
IISSSRYLKACQQLLEEVCSVGREERQEFELKKSCLIAMLQEVDRRYRQYNDQM QVVISSFDAVAGTGS  
ATPYTALALQAMSRYFRCLKDAITGQIQLVCKALGEEDTSRLRFIDQQIRQQRAFLGMLHAWRPQRGLP  
ERSVSILRAWLFEHFLHPYPKDADKMMLARQTGLTRSQVSNWFINARVRLWKPMVEEMYQEETR  
>SkBEL2  
FVSGSRYLRAAQQLLDEVCSVGREEKQDHEGKKTLLAMLQEVDRRYRQYYDQM QVVITSFDTVAGV  
GAATPYTALALQAMSRYFRCLRDAITGQIQITCKALGEEDTSRLRFIDQQIRQQRAYYGMLHAWRPQR  
GLPERSVLSILRAWLFEHFLHPYPKDADKMMLARQTGLTRKQVSNWFINARVRLWKPMVEEMYQEETK  
>ZTHV-2017075  
HIATSRFLKTAQDVLNEVCRVSQESREELELKKGRLILMLDEVEARYRRYCDHLQVVITRFNSRAGPGA  
ATPYTILALHAMSRRHFRCLRDAIRHQLKVVKRALGEEETRLRYIDQQMRQQRTLMQM QNAWRPQRG  
LPERAVSVLRGWLFEHFLQYPYPKDVKLSLAKQTGLTRSQVSNWFINARVRLWKPMVEEMYLEEQK  
>evm\_27.model.AmTr\_v1.0\_scaffold00001.384  
EIKNSRYLVPAQKLLYEFCLNLSGSSDLFELQKRK-----VDKRYKQYCERMRSVASSFEAVAGAGAAHV  
YLGMA SRAMSRRHFRCLRDGIVAQLRATRVALGEKETPSLKLVDQQLRRQRALMGMHPWRPQRGLP  
ERSVSLLRRAWLFEHFLHPYPSDVKHILARQTGLSRSQVSNWFINARVRLWKPMVEEMYLEEAK  
>evm\_27.model.AmTr\_v1.0\_scaffold00002.320  
TISNSKYLKAAQQLLDEVVNVGNTERRQDLQTKLTKLLGMLDEVDRRYKQYYHQMQIVVSSFDAIAGAG  
AAKTYTALALQTISKHFRCLRDAINGQIRATQKSLGEQDLSRLRFVDQQLRQQRALLGMMHAWRPQRG  
LPESVLSILRAWLFEHFLHPYPKDSDKMLARQTGLSRSQVSNWFINARVRLWKPMVEEMYKEEIG  
>evm\_27.model.AmTr\_v1.0\_scaffold00009.52  
ILKSSKFLRPAQLILSEFCVTKGDGIEFHKKKTRLMALFDEVYRRYRIYQHMQMSVISSFESIAGLSAAT  
PYTSLALKAMSKHFRCLKNVISDQLKQMSSLLGEEIPLRFLDQIRIRHQQQMGLHVWRPQRGLPE  
RSVAVLRAWLFEHFLHPYPTDNDKHVLASQTGLSRNQVSNWFINARVRLWKPMVEEIHMLESK  
>evm\_27.model.AmTr\_v1.0\_scaffold00030.108  
VLMGSKYLKAAQELLDEVVSVGKVERQEVQMKKAKLVAMLDEV DQRYRQYHHQMHLVVSSFEAAAG  
LGAAKTYTALALQTISRQFRCLRDAISSQIKSASKALGEEDGSRLRYVDHQLRQQRALLGMINAWRPQR  
GLPERSVSVLRAWLFEHFLHPYPKDADKHMLAKQTGLTRSQVSNWFINARVRLWKPMVEEMYMEEM  
R  
>evm\_27.model.AmTr\_v1.0\_scaffold00059.154  
-----MELLEEFCSVGRADRFEHQRRKAKLLSMVDEVDRRYSHYCDQM QMVVNSFDSIVGIGAATPY  
TVLAQKAMSRHFRCLRDAINGQLKLISELLGEKETPRLKLLQSLRQQRAFLGMMEAWRPQRGLPERS  
VNILRAWLFEHFLHPY-----VSNWFINARVRLWKPMVEEMYQEESK  
>evm\_27.model.AmTr\_v1.0\_scaffold00165.33  
ILKSSTFLKPAQQLLDEFVNVGQSDRAENHKKKTKLVSMMLNEVFQRYKLYYNQM QMVMVTSFECVAGL  
SAAAPYTALALRAMSKHFKCLKNAIADQLLSTSRALGEDCSTSLRILDQSLRHQRTVSAIIHVWRPQRGL  
PERAVAVLRAWLFEHFLHPYPTD TDKQMLAKQTGLTRNQVSNWFINARVRLWKPMVEEMHMLENK
